# Supplementary material for: Prospects of 2D graphene nanomaterials in plant-based agriculture and their fate in terrestrial soil: a critical review
Source: Royal Society of Chemistry journal article supplement (doi:10.1039/d3en00511a), 2023-01-01
Supplement: d3en00511a1.pdf [file d3en00511a1.pdf]

# Prospects of 2D graphene nanomaterials in plant-based agriculture and their fate in terrestrial soils: A critical review

Partho Das<sup>1,3</sup>, C. Ryan Penton<sup>2</sup>, Paul Westerhoff<sup>1</sup> and François Perreault<sup>1,4\*</sup>

<sup>1</sup>School of Sustainable Engineering and the Built Environment, Arizona State University, Tempe, AZ.

<sup>2</sup>College of Integrative Sciences and Arts, Faculty of Science and Mathematics,  
Arizona State University, Mesa, AZ, USA.

<sup>3</sup>Institute of Water and Flood Management, Bangladesh University of Engineering and Technology, Dhaka, Bangladesh.

<sup>4</sup>Department of Chemistry, University of Quebec in Montreal, Montreal, QC, Canada

\*Corresponding author: [perreault.francois@uqam.ca](mailto:perreault.francois@uqam.ca)

| Item                     | Pages |
|--------------------------|-------|
| Supplementary Table: S.1 | 2-11  |
| Supplementary Table: S.2 | 12-20 |
| Supplementary Table: S.3 | 21-28 |
| References               | 28-37 |

**Table S.1: Impacts of graphene on soil biocomponents (microbes, fungi, algae, earthworms, nematodes, arthropods, mites)**

| Table S.1.1: Impacts of graphene on microbes |                  |               |                                                                            |                            |                                                                                                                                                                                                                                                                                                    |           |
|----------------------------------------------|------------------|---------------|----------------------------------------------------------------------------|----------------------------|----------------------------------------------------------------------------------------------------------------------------------------------------------------------------------------------------------------------------------------------------------------------------------------------------|-----------|
| Positive impacts                             |                  |               |                                                                            |                            |                                                                                                                                                                                                                                                                                                    |           |
| Type of graphene                             | Application dose | Exposure Time | What was assessed?                                                         | Experimental matrix/system | Major findings                                                                                                                                                                                                                                                                                     | Reference |
| GO                                           | 10 and 100 mg/L  | 4 h to 10 d   | Impact on nitrifying capability and nitrous oxide generation and mechanism | Activated sludge           | -After short exposure of 4h:<br>No impact on nitrifying capability.                                                                                                                                                                                                                                | (1)       |
|                                              |                  |               |                                                                            |                            | -After long exposure of 10 ds:<br>Nitrifying capability was altered due to lower EPS contents and bacterial abundance.                                                                                                                                                                             |           |
| GO, rGO                                      | —                | 0 to 7 d      | Impacts of graphene on biological nitrogen removal                         | Sediment                   | -The nitrogen removal was enhanced (125%) due to the intensification of the interaction on the microbial community between stochastic assembly and deterministic assembly.<br>-The high electron transfer efficiency and higher denitrifying enzyme activities (NAR, NIR, NOS, NOZ) were achieved. | (2)       |
| Micrographite                                | 40 to 200 mg/L   | 8hr           | Denitrification in synthetic and industrial wastewater                     | Wastewater                 | -Denitrification rate was increased.<br>-The abundance of denitrifying bacteria and <i>nirS</i> gene abundance increased significantly due to MGPs.                                                                                                                                                | (3)       |

|          |                |             |                                                                           |               |                                                                                                                                                                                                                                 |      |
|----------|----------------|-------------|---------------------------------------------------------------------------|---------------|---------------------------------------------------------------------------------------------------------------------------------------------------------------------------------------------------------------------------------|------|
| rGO      | 10–500 mg/L    | 1 to 14 d   | Impact of rGO on nitrogen-fixing bacterium <i>Azotobacter chroococcum</i> | Culture media | -rGO promoted nitrogen fixation activity of <i>A. chroococcum</i> at 0.5 mg/mL.<br>-rGO increased soil nitrogen contents; 30% increase of organic nitrogen occurred at 0.5 mg/mL                                                | (4)  |
| rGO      | 50 to 200 mg/L | 4hr         | Impact of GO on annamox bacteria biomass and enzyme activities            | Culture media | -100 mg/L rGO enhanced the total nitrogen removal rate of 17.2%.<br>-HDH, NIR, NAR activities were enhanced with different dose rGO.                                                                                            | (5)  |
| GO       | 25 mg/L        | 16 hr       | Impact of GO on bacterial and mammalian cell                              | Culture media | -GO acts as a general enhancer of cellular growth by increasing cell attachment and proliferation.<br>-GO does not have intrinsic antibacterial, bacteriostatic, and cytotoxic properties in both bacteria and mammalian cells. | (6)  |
| nGO-PEGs | 20 mg/L        | 2hr         | Impact on <i>E. coli</i>                                                  | Culture media | -DNA synthesis and extracellular polymeric substance (EPS) secretion was increased.<br>-nGO-PEG (1:1) treatment could remarkably enhance (up to 6-fold) recombinant protein production in engineered bacteria cells.            | (7)  |
| GO       | 200 mg/L       | 24 to 72 hr | Biodegradation of GO by bacteria in anaerobic condition                   | Culture media | -GO can act as terminal electron acceptor for heterotrophic, metal-reducing, and environmental bacteria.<br>-In anaerobic condition, bacteria can transform GO by bacterial respiration and glycolysis process.                 | (8)  |
| GO       | 150 g/L        | 24 hr       | Biodegradation of GO by <i>Shewanella</i>                                 | Culture media | -Reduction of GO by respiration of <i>Shewanella</i> can takes place in an aerobic condition.<br>-Extracellular electron transfer (EET) pathways played a key role in the reduction of GO.                                      | (9)  |
| GO       | 800 mg/L       | 40 hr       | Biodegradation of GO by <i>Shewanella</i>                                 | Culture media | -GO reduction by <i>S. oneidensis</i> is catalyzed primarily by the Mtr respiratory pathway                                                                                                                                     | (10) |
| GO, rGO  | 0.5 to 500     | 48 hr       | Impact of GO and rGO on biofilm formation                                 | Culture media | -GO proliferated cell growth, biofilm formation, and biofilm development even at a concentration of 500 mg/L.<br>-rGO imposes oxidative stress on biofilm formation.                                                            | (11) |

|                         |                         |                      |                                                                                    |                            |                                                                                                                                                                                                                       |                   |
|-------------------------|-------------------------|----------------------|------------------------------------------------------------------------------------|----------------------------|-----------------------------------------------------------------------------------------------------------------------------------------------------------------------------------------------------------------------|-------------------|
|                         | mg/L                    |                      |                                                                                    | a                          |                                                                                                                                                                                                                       |                   |
| GO                      | 50-100 mg/L             | 42 hr                | Impact of GO on anammox activity                                                   | Culture media              | -GO enhanced the activity of anammox bacteria in a dose-dependent manner. GO can stimulate the increase of EPS.<br>-GO can be used as a scaffold for anammox bacteria attachment.                                     | (12)              |
| GO                      | 0–150 mg/L              | 42 hr                | Impact of GO anammox bacteria                                                      | Column reactor             | -GO can act as biocompatible site for <i>E. Coli</i> adsorption and followed by proliferation in the nanomaterial surface.                                                                                            | (13)              |
| rGO                     | 280 mg/L                | HR T: 2 d            | Nitrogen removal (by Anammox process) and microbial community change.              | Batch reactor              | -The effect of the temperature drop on the nitrogen removal rate was reduced for biomass entrapped in SA and SA-rGO gel beads.<br>-microbial community composition and relative gene abundance changed significantly. | (14)              |
| Graphite, GO, rGO       | 500 mg/L                | 14 d                 | Impact of naphthalene-degrading bacteria to oxidize graphitic materials            | Electrochemical test       | -rGO had higher degree of oxidation compared to graphite.<br>-GO oxidized by bacteria and breaks into small pieces<br>-Contact between bacteria and graphitic materials accelerates electron transfer.                | (15)              |
| <b>Negative impacts</b> |                         |                      |                                                                                    |                            |                                                                                                                                                                                                                       |                   |
| <b>Type of graphene</b> | <b>Application dose</b> | <b>Exposure time</b> | <b>Microbe/ Fungi/ Algae/ Gene abundance/community sequencing/ Enzyme activity</b> | <b>Experimental matrix</b> | <b>Major findings</b>                                                                                                                                                                                                 | <b>References</b> |
| GO                      | 5–500 mg/L              | 24 h to 14           | Impact of GO on nitrogen-fixing bacterium                                          | Culture media              | -The toxicity of GO to <i>A. chroococcum</i> at high concentration was assigned to the cell wall wreck and oxidative stress.<br>-In soil, GO showed alleviated toxicity compared to culture media                     | (16)              |

|                         |                 |     |                                                                                                                                                                             |                  |                                                                                                                                                                                                                                                                                                                                                                                                                   |          |
|-------------------------|-----------------|-----|-----------------------------------------------------------------------------------------------------------------------------------------------------------------------------|------------------|-------------------------------------------------------------------------------------------------------------------------------------------------------------------------------------------------------------------------------------------------------------------------------------------------------------------------------------------------------------------------------------------------------------------|----------|
|                         |                 | d   |                                                                                                                                                                             | a                | and soil nitrogen contents slightly increased at high concentrations.                                                                                                                                                                                                                                                                                                                                             |          |
| Graphite                | 0.5 mg/L        | 3h  | Impacts of graphite on nitrifying bacteria and microbial community.                                                                                                         | Activated sludge | -The nitrification efficiency decreased significantly after dosing with GNPs. -GNPs led to EPS breakage from bacterial cells and decreased the quantity of total viable bacteria after dosing.                                                                                                                                                                                                                    | (17)     |
| GO and rGO              | 1 to 500 mg/L   | 3h  | Impact of different degrees of reduction of GO on its antimicrobial effect on <i>E. Coli</i> .                                                                              | 0.9% NaCl        | -Antibacterial effects of GO increases when GO is thermally reduced (at high C:O ratio). The EC <sub>50</sub> for pristine GO and thermally annealed GO at 200, 500, and 800 degrees are 183, 143, 127, and 86 µg/mL respectively.<br>-The mechanism of inhibition of cell growth is adsorption of bacterial cells on GO                                                                                          | (18, 19) |
| GO and rGO              | X               | 1h  | Toxicity of GO and rGO nanowalls on <i>E. coli</i> and <i>S. aureus</i>                                                                                                     | Saline solution  | -Overall, graphene nano wall is significantly more toxic to microorganisms without a membrane structure than microorganisms with membrane structure.<br>-GO-nano- sheets showed 60% and 70% cell viability decrease in <i>Escherichia coli</i> and <i>Staphylococcus aureus</i> , respectively.<br>-rGONWs (GONWs reduced by hydrazine) exhibited more antibacterial activity as compared to the unreduced GONWs. | (20)     |
| GO and GO nanocomposite | 10 to 1000 mg/L | 3hr | Antibacterial effects of PVK-GO on two Gram-negative bacteria: <i>E. Coli</i> , <i>C. metallidurans</i> and gram-positive bacteria: <i>B. subtilis</i> and <i>R. opacus</i> | Culture media    | -Nanocomposite PVK-GO has been demonstrated to have higher antimicrobial effects than GO alone, with 97% lower concentrations than the pure nano- material.                                                                                                                                                                                                                                                       | (21)     |
| Graphite, GtO           | 40 mg/L         | 2hr | Antibacterial activity on <i>E. Coli</i>                                                                                                                                    | Isotonic saline  | -Antibacterial activity of graphene is time and concentration dependent.<br>-Antimicrobial actions are contributed by both membrane and oxidation stress.                                                                                                                                                                                                                                                         | (22)     |

|           |                |     |                                                                                                        |          |                                                                                               |      |
|-----------|----------------|-----|--------------------------------------------------------------------------------------------------------|----------|-----------------------------------------------------------------------------------------------|------|
| , GO, rGO |                |     |                                                                                                        | solution | -rGO and Gt have higher oxidation capacities than insulating GO and GtO.                      |      |
| GO        | 10 to 500 mg/L | 2hr | Impact on phytopathogenic bacteria ( <i>P. syringae</i> and <i>X. campestris</i> pv. <i>undulosa</i> ) | LB Agar  | -GO mechanically wrapped and locally damaged the cell membrane and finally caused cell lysis. | (23) |

**Table S.1.2: Impacts of graphene on Fungi**

| Type of graphene | Application dose                   | Exposure Time | Microbe/ Fungi/ Algae/ Gene abundance/community sequencing/ Enzyme activity  | Experimental matrix       | Major findings                                                                                                                                                                            | References |
|------------------|------------------------------------|---------------|------------------------------------------------------------------------------|---------------------------|-------------------------------------------------------------------------------------------------------------------------------------------------------------------------------------------|------------|
| GO               | 50 to 500 mg/L                     | 7 d           | Antifungal Activity of GO against <i>B. sorokiniana</i> In Vitro and In Vivo | PDA medium                | -Appropriate GO dose can exhibit excellent antifungal properties on <i>B. sorokiniana</i> both in vitro and in vivo.<br>-Anti-fungal effect of GO caused by destruction of cell membrane. | (24)       |
| GO               | GO and fungicide ratio: 1:9 to 9:1 | 120 h, 7 d    | Synergistic antifungal activity of GO against <i>Fusarium graminearum</i>    | PD medium and field trial | -GO synergistically inhibits <i>F. graminearum</i> in vitro and in vivo<br>-magnitude of synergy depending on the ratio of GO and fungicide.                                              | (25)       |

|                           |                 |            |                                                                                                                             |                     |                                                                                                                                                                                                                                                                   |      |
|---------------------------|-----------------|------------|-----------------------------------------------------------------------------------------------------------------------------|---------------------|-------------------------------------------------------------------------------------------------------------------------------------------------------------------------------------------------------------------------------------------------------------------|------|
| GNP                       | 160, 800 mg/L   | 2,4, 24 hr | Impact of polycarboxylate functionalized graphene nanoplatelet on <i>Saccharomyces cerevisiae</i>                           | YPD medium          | - oxidative stress induced at a lower concentration (160 mg L <sup>-1</sup> ), after short exposure periods (2 and 4 hours).<br>- cell proliferation was not negatively affected even in the presence of 800 mg L <sup>-1</sup> of the nanomaterial for 24 hours. | (26) |
| Graphene, GO              | 10 and 200 mg/L | 10 d       | Impact of G and GO on <i>Aspergillus niger</i> and <i>Aspergillus flavus</i>                                                | Czapek liquid media | -G and GO showed antifungal properties toward <i>A. niger</i> and <i>A. flavus</i><br>- G and GO caused growth inhibition, apoptotic-like cell death responses and changes in VOC and enzymatic production.                                                       | (27) |
| Graphene, GO              | 30 mg/L         | 2 to 18 d  | Impact of graphene, and oxidized graphene on extracellular enzymes activities of a fungal strain ( <i>Cladosporium</i> sp.) | Culture media       | -Stimulated extracellular enzyme activity.<br>-Extracellular enzymes were adsorbed by CNMs to a considerable extent.<br>-G and GO electron conductors to enhance extracellular direct electron                                                                    | (28) |
| rGO                       | 0.25 to 4 mg/mL | 14 d       | Impact of rGO on the growth, structure and decomposition activity of white-rot fungus <i>P. chrysosporium</i>               | Culture media       | -rGO had no significant influence on the decomposition activity of white-rot fungus.                                                                                                                                                                              | (29) |
| GO                        | 25 to 600 mg/L  | 24 hr      | Taxological effect of GO on <i>Saccharomyces cerevisiae</i>                                                                 | YPD medium          | -Cell proliferation was inhibited and the IC <sub>50</sub> value was 353 mg L <sup>-1</sup> .                                                                                                                                                                     | (30) |
| GO and GO-Fe <sub>3</sub> | 50 to 500 mg/L  | 7 d        | Antifungal activity of GO against <i>Plasmopara viticola</i>                                                                | Petri dish          | -GO-Fe <sub>3</sub> O <sub>4</sub> at 250 µg mL <sup>-1</sup> could significantly depress the disease severity of downy mildew.<br>-High dosage of GO-Fe <sub>3</sub> O <sub>4</sub> (1000 µgmL <sup>-1</sup> ) had no phytotoxic effect on plant leaves.         | (31) |

|                                           |                   |                |                                                                                                                                                    |                      |                                                                                                                                                                                                    |      |
|-------------------------------------------|-------------------|----------------|----------------------------------------------------------------------------------------------------------------------------------------------------|----------------------|----------------------------------------------------------------------------------------------------------------------------------------------------------------------------------------------------|------|
| O4                                        |                   |                |                                                                                                                                                    |                      |                                                                                                                                                                                                    |      |
| GO                                        | 0.1 to 4 mg/mL    | 14 d           | Impact on white rot fungus (WRF) <i>Phanerochaete chrysosporium</i>                                                                                | Fungal culture media | -Low concentrations of GO stimulated the growth of <i>P. chrysosporium</i> .<br>-At high concentration, inhibition of weight gain and loss of ordinary morphologies/ultrastructures were observed. | (32) |
| GO, rGO                                   | 62.5 to 500 µg/mL | 72 h and 120 h | Impact on plant pathogenic fungi ( <i>F. graminearum</i> and <i>F. poae</i> )                                                                      | PDA                  | -Both GO and rGO exhibit strong antifungal activity against <i>F. graminearum</i> and <i>F. poae</i>                                                                                               | (33) |
| GO                                        | 10 to 500 mg/L    | 5h, 7h         | Impact on phytopathogenic fungus ( <i>F. graminearum</i> and <i>F. oxysporum</i> )                                                                 | PDA                  | -Spore germination inhibition or deformed germination action was GO concentration dependent.<br>-Antifungal activity caused by damaging cell membrane integrity,                                   | (23) |
| rGO                                       | 1 to 500 µg/mL    | 7 d            | Antifungal activity of rGO nanosheets against three fungi i.e., <i>Aspergillus niger</i> , <i>Aspergillus oryzae</i> and <i>Fusarium oxysporum</i> | PDA                  | -IC <sub>50</sub> values of rGO nanosheets against <i>F. oxysporum</i> , <i>A. niger</i> , and <i>A. oryzae</i> are 50, 100, and 100 µg per mL, respectively.                                      | (34) |
| GO                                        | 62.5 to 500 mg/L  | 5 d            | Antifungal activity of GO                                                                                                                          | PDB; CMC media       | - GO significantly reduced the mycelial biomass and branching of FG strain PH-1.                                                                                                                   | (35) |
| Table S.1.3: Impacts of graphene on Algae |                   |                |                                                                                                                                                    |                      |                                                                                                                                                                                                    |      |

| Type of graphene | Application dose | Exposure Time | Microbe/ Fungi/ Algae/ Gene abundance/community sequencing/ Enzyme activity                                                              | Experimental matrix       | Major findings                                                                                                                                                                                                                                                                                                   | References |
|------------------|------------------|---------------|------------------------------------------------------------------------------------------------------------------------------------------|---------------------------|------------------------------------------------------------------------------------------------------------------------------------------------------------------------------------------------------------------------------------------------------------------------------------------------------------------|------------|
| GO and rGO       | 1 to 100 mg/L    | 96 hr         | Impact of surface chemistry of GO on its antimicrobial effect on algae ( <i>S. obliquus</i> ) and cyanobacteria ( <i>M. aeruginosa</i> ) | Bold's Basal Medium (BBM) | -Chlorophyll (Chl a) based EC <sub>50</sub> measurement showed for <i>M. aeruginosa</i> GO with higher C/O ratio (more reduced GO) is less toxic.<br>-For <i>S. obliquus</i> , EC <sub>50</sub> estimation was not possible due to no change in biomass for any of the tested condition of thermally reduced GO. | (19)       |
| GO and rGO       | 1 to 100 mg/L    | 96 hr         | Toxicity mechanism of GO on <i>M. aeruginosa</i>                                                                                         | Bold's Basal Medium (BBM) | -GO didn't cause any oxidative stress or membrane damage but indirect toxicity was caused by physical mechanisms associated with light shading and cell aggregation.                                                                                                                                             | (36)       |
| GO               | 0.39 to 200 mg/L | 24 to 72 hr   | Toxicity of GO towards <i>Raphidocelis subcapitata</i> and <i>Synechococcus elongatus</i>                                                | ZBB medium                | -Cyanobacterium exhibited more GO sensitivity and more rapid growth inhibition than the algae.<br>- Toxicity of GO caused by shading/aggregation of GOs and nutrient depletion.                                                                                                                                  | (37)       |

|                   |                   |             |                                                                                                                                         |                     |                                                                                                                                                                                                                                                                                       |      |
|-------------------|-------------------|-------------|-----------------------------------------------------------------------------------------------------------------------------------------|---------------------|---------------------------------------------------------------------------------------------------------------------------------------------------------------------------------------------------------------------------------------------------------------------------------------|------|
| GO, rGO, Graphene | 50 mg/L           | 96 hr       | Toxicity of GO, rGO, and MG to <i>Chlorella pyrenoidosa</i> based on their different physicochemical properties and colloidal behaviors | Algal medium        | -96-h EC <sub>50</sub> values of GO, rGO, and MG to <i>Chlorella pyrenoidosa</i> was estimated as 37, 34, and 62 mg/L, respectively<br>-GO caused shading effect, oxidative stress-induced membrane damage, and nutrient depletion whereas rGO and MG didn't show any shading effect. | (38) |
| rGO               | 10 to 300 mg/L    | 24 to 96 hr | Toxicity of rGO on <i>Scenedesmus obliquus</i>                                                                                          | HB-4 culture medium | -rGO induces dose-dependent cytotoxic effects on algal growth.<br>-rGO produced extracellular surface coating and intracellular morphological changes.<br>-Cell wall and cellular membrane integrity were lost after treatment.                                                       | (39) |
| GO                | 0.01 –10 mg/L     | 96 hr       | Nanotoxicity of GO on <i>Chlorella vulgaris</i>                                                                                         | BG-11 medium        | -The metabolisms of alkanes, lysine, octadecadienoic acid and valine was associated with ROS.<br>- SWCNT was reported more toxic compared to GO.                                                                                                                                      | (40) |
| GO                | 0.01 to 10.0 mg/L | 96 hr       | Impact of different sized GO on <i>Chlorella vulgaris</i>                                                                               | BG-11 medium        | - GOQD (size: 20-50 nm) induced more obvious biological effects than GONS (size: 1–5 µm), including cellular uptake, cell division, cell permeability, and oxidative stress.                                                                                                          | (41) |

**Table S.1.4: Impacts of graphene on soil earthworms, nematodes**

|          |               |     |                                                                                 |      |                                                                                                                                                                               |      |
|----------|---------------|-----|---------------------------------------------------------------------------------|------|-------------------------------------------------------------------------------------------------------------------------------------------------------------------------------|------|
| Graphene | 0.3 to 3 g/kg | 7 d | Metabolic response of earthworms ( <i>Eisenia fetida</i> ) to graphene exposure | Soil | -No concentration-dependent metabolic response for the 7-d experiment.<br>- All the 12 examined metabolites of earthworms were significantly changed after graphene exposure. | (42) |
|----------|---------------|-----|---------------------------------------------------------------------------------|------|-------------------------------------------------------------------------------------------------------------------------------------------------------------------------------|------|

|                          |                                      |             |                                                                                                                 |                    |                                                                                                                                                                                                                                                                                                                   |      |
|--------------------------|--------------------------------------|-------------|-----------------------------------------------------------------------------------------------------------------|--------------------|-------------------------------------------------------------------------------------------------------------------------------------------------------------------------------------------------------------------------------------------------------------------------------------------------------------------|------|
| Multilayer graphene, MLG | 0.2% and 1%                          | 28 d        | Impact of three different multi-layer graphene on earthworms ( <i>Eisenia fetida</i> )                          | Soil               | <ul style="list-style-type: none"> <li>- Earthworms avoided smaller and more hydrophilic MLG.</li> <li>- Larger and more hydrophobic MLG exerted a higher oxidative stress.</li> <li>- Smaller and more hydrophilic MLGs had a negative effect on survival and mitochondrial activity of coelomocytes.</li> </ul> | (43) |
| GO                       | 5 to 30 g/kg                         | 7 to 28 d   | Toxicity of GO on earthworms ( <i>Eisenia fetida</i> ).                                                         | Soil               | - GO can induce oxidative stress and genotoxicity in earthworm that caused lipid peroxidation, decreased lysosomal membrane stability and DNA damage.                                                                                                                                                             | (44) |
| GO                       | 5 to 30 g/kg                         | 28 and 56 d | Impact of GO on the growth, survival, reproduction, and ultrastructure of earthworms ( <i>Eisenia fetida</i> ). | Soil; Filter paper | <ul style="list-style-type: none"> <li>-Earthworm growth was significantly inhibited with increasing GO concentrations and exposure ds.</li> <li>-GO exposure significantly decreased the reproductive capacity.</li> </ul>                                                                                       | (45) |
| FLG                      | 100 to 1000 mg/L                     | 1 to 48 h   | Uptake of FLG by fresh water worm <i>Limnodrilus hoffmeisteri</i> was examined                                  | Water              | <ul style="list-style-type: none"> <li>- Protein-coated FLG had higher uptake compared to the non-modified FLG</li> <li>-FLG got coated and altered in size distribution by <i>L. hoffmeisteri</i> secreted proteins</li> </ul>                                                                                   | (46) |
| rGO                      | 0.1–15.7 µg/cm <sup>2</sup> ; 100 to | 48 hr; 28 d | Impact of rGO on <i>Eisenia fetida</i>                                                                          | Filter paper; Soil | -rGO caused no acute toxicity but a significant weight loss which may be due to metabolism interference.                                                                                                                                                                                                          | (47) |

|                                                                    |               |       |                                                                                                                 |      |                                                                                                                                                                                                                                                                                                                                                                                     |      |
|--------------------------------------------------------------------|---------------|-------|-----------------------------------------------------------------------------------------------------------------|------|-------------------------------------------------------------------------------------------------------------------------------------------------------------------------------------------------------------------------------------------------------------------------------------------------------------------------------------------------------------------------------------|------|
|                                                                    | 1000<br>mg/kg |       |                                                                                                                 |      |                                                                                                                                                                                                                                                                                                                                                                                     |      |
| Graphene, GO                                                       | 1% (wt basis) | 130 d | Impact of graphene, GO on the abundance and diversity of soil nematodes                                         | Soil | <ul style="list-style-type: none"> <li>- Addition of graphene resulted in a community with a higher plant-parasitic index.</li> <li>- Presence of graphene and GO increased the numbers of bacterivores, and graphene benefited fungivores.</li> <li>- GO decreased the values of nematode community parameters, e.g., diversity, species richness, and structure index.</li> </ul> | (48) |
| <b>Table S.1.5: Impacts of graphene on soil arthropods, mites:</b> |               |       |                                                                                                                 |      |                                                                                                                                                                                                                                                                                                                                                                                     |      |
| Graphene, GO                                                       | 1g/100 g soil | 130 d | Impact of G and GO on microarthropods in turfgrass soil                                                         | Soil | <ul style="list-style-type: none"> <li>- Both graphene and GO increased the abundances of multiple trophic functional groups, including predators, detritivores, herbivores and fungivores.</li> <li>- Total taxonomic richness, Shannon diversity index, and dominance index of the microarthropod community increased, but evenness index decreased.</li> </ul>                   | (49) |
| GO                                                                 | x             | x     | Synergistic mortality effects between pesticides and GO against <i>T. truncatus</i> and <i>T. urticae</i> mites | X    | <ul style="list-style-type: none"> <li>- GO can serve as a carrier of pesticides to be adsorbed on the surface of mites and improve the dispersibility and utilization efficiency of pesticides.</li> <li>- GO-pesticide complex increased the adhesion of pesticides on the cuticle of pests and reduce pesticide loss.</li> </ul>                                                 | (50) |

**Table S.2: Impact of graphene on plant**

| Type of graphene        | Application dose        | Plant growth Time (or exposure time) | Experimental system    | Plant type              | Type of stress/ Challenge       | Major findings                                                                                                                                                                                                                             | Reference |
|-------------------------|-------------------------|--------------------------------------|------------------------|-------------------------|---------------------------------|--------------------------------------------------------------------------------------------------------------------------------------------------------------------------------------------------------------------------------------------|-----------|
| <b>Positive impacts</b> |                         |                                      |                        |                         |                                 |                                                                                                                                                                                                                                            |           |
| Graphene                | 0.5%, 1% and 2% (w/w)   | 40 d                                 | Soil application       | Alfalfa                 | Salinity and alkalinity stress  | Fresh weight and dry weight of leaves increase at lower dose (0.5%) and decrease in higher dose (1%, 2%).                                                                                                                                  | (51)      |
| GO                      | 100 mg/L (irrigation)   | 3 d                                  | Soil application       | Paeonia ostii           | Drought stress                  | Prevented soil water evaporation.<br>Lowered increase in ROS generation and increased antioxidant enzyme activity.<br>Caused higher photosynthesis, intact mesophyll cells and organelles and open stomata.<br>No accumulation in P. ostii | (52)      |
| Graphene                | 50 to 200 mg/L or mg/kg | 1 to 4 weeks                         | Agar; Soil application | Catharanthus and cotton | Salinity stress; Drought stress | Increased early flowering.<br>Increased total flowering.<br>Increased the plant survival decreased leaf wilting in drought condition.                                                                                                      | (53)      |

|                                 |                 |                         |                                |                                      |                                                               |                                                                                                                                                         |      |
|---------------------------------|-----------------|-------------------------|--------------------------------|--------------------------------------|---------------------------------------------------------------|---------------------------------------------------------------------------------------------------------------------------------------------------------|------|
| GO, Methionine-GO and lysine-GO | 20 mg/L         | 165 d                   | Foliar application             | Pearl millet (Pennisetum glaucum L.) | Salinity stress                                               | Increased plant growth, biomass accumulation, total protein content, photosynthetic pigment content, and yield.                                         | (54) |
| Grap hene                       | 50 to 200 mg/L  | 4 weeks (3 application) | Growth media; Soil application | Sorghum and switchgrass              | Salinity stress                                               | Increased seed germination.<br>Increased total biomass production.<br>Reduced salt stress effect on seed germination.                                   | (55) |
| Grap hene                       | 25, to 150 g/kg | 30 d                    | Soil application               | Maize                                | Plant growth, soil physiochemical parameter, nutrient content | Increased soil aggregate size.<br>Increased soil available nutrient content.<br>Improved nutrient absorption by maize plant.<br>Enhanced plant biomass. | (56) |
| GO                              | 50 to 100 g/kg  | –                       | Soil application               | Grape vine                           | Salinity stress                                               | Improved MDA, TSS, and chlorophyll a content.<br>Improved antioxidant enzymes activity, osmolytes, and the mineral nutrients balance.                   | (57) |
| GO                              | 150 to 450 mg/L | 4 weeks                 | Culture media                  | Lepidium sativum L. Calli            | Salinity stress                                               | Improved the production of target secondary metabolites.<br>Reduced salt stress by accumulation of phenolics and PAL activity.                          | (58) |
| GO                              | 12.5 to 50 mg/L | 180 d                   | Soil application               | Red pine (Pinus                      | Root growth                                                   | Increased the root length, root projected area, root surface area, root volume, root tip number and root fork number                                    | (59) |

|                   |                  |            |                                      |                               |                              |                                                                                                                                                                                          |         |
|-------------------|------------------|------------|--------------------------------------|-------------------------------|------------------------------|------------------------------------------------------------------------------------------------------------------------------------------------------------------------------------------|---------|
|                   |                  |            |                                      | tabuliformis Carr.)           |                              |                                                                                                                                                                                          |         |
| GO                | 100 to 800 mg/L  | 49 d       | Culture media                        | Plantago major L. calli       | Drought stress               | Decreased the adverse effects of drought stress by enhanced proline content and decreased H <sub>2</sub> O <sub>2</sub> level.                                                           | (60)    |
| GO                | 0.1 to 10 mg/L   | 24 to 30 d | MS nutrient medium; Stem application | Watermelon and A. thaliana L. | Plant growth; Fruit ripening | Increased A. thaliana root length, leaf area and number, and formation of flower buds.<br>Increased the perimeter and sugar content in watermelons.                                      | (61)    |
| Graphene          | 40 mg/L          | 4 d        | DI water                             | Tomato                        | Seed germination             | Faster seed germination.<br>Increased length of seedling stems and roots.                                                                                                                | (62)    |
| GO                | 50, 200 mg/L     | 40 to 45 d | Soil application                     | Spinach, Chive                | Seed germination             | Higher water retention in soil<br>Accelerated seed germination due to transport of water by hydrophobic sp <sup>2</sup> domains of GO<br>No phytotoxic as no translocation in plant cell | (63)    |
| FLG               | 50 to 100 mg/L   | 30 d       | MS medium                            | Tomato                        | Seed germination             | Enhanced seed germination                                                                                                                                                                | (64)    |
| Graphene ribbon   | 200 mg/L         | 5 d        | Water                                | Wheat (Triticum aestivum L.)  | Seed germination             | Increased seed germination of aged seed.<br>Enhanced resistance to oxidative stress.                                                                                                     | (65)    |
| Single bilayer GO | 100 to 1600 mg/L | –          | hydroponic culture                   | Faba Bean                     | Seed germination             | Dose dependent positive and negative effect.<br>Increased seed germination and root elongation.                                                                                          | (66,67) |

|                                |                  |           |                   |                           |                                        |                                                                                                                                                                                                                |      |
|--------------------------------|------------------|-----------|-------------------|---------------------------|----------------------------------------|----------------------------------------------------------------------------------------------------------------------------------------------------------------------------------------------------------------|------|
| GO                             | 0.1 to 10 mg/L   | 40 d      | Culture medium    | Gala apple                | Root formation and growth              | Improved root formation but impaired root elongation.                                                                                                                                                          | (68) |
| Grap hene                      | 12.5 to 50 mg/L  | 6 mon ths | Soil applicati on | Pinus tabulifor mis Carr. | Root growth                            | Increased root fresh weight and root dry weight.                                                                                                                                                               | (59) |
| GO                             | 10 to 100 mg/L   | 4 mon ths | Soil applicati on | Aloe vera L.              | Plant growth                           | Increased photo synthetic capacity and nutrient content (protein and amino acid) of leaf.<br>Increased the yield and morphology of root and leaf.<br>Do not alter production of bioactive compound aloin.      | (69) |
| Grap hene                      | 20 to 100 mg/L   | 30 d      | Soil applicati on | Zea mays L.               | Root develop ment                      | Increased total root length, root volume, and the number of root tips and forks                                                                                                                                | (70) |
| GO; Amin e functi onali zed GO | 125 to 2000 mg/L | 9 d       | Hydropo nic       | Wheat                     | Seed germina tion and seedlin g growth | GO inhibited the germination, and G-NH <sub>2</sub> enhanced.<br>GO restrained seedling growth but G-NH <sub>2</sub> enhanced seedling growth.<br>GO or G-NH <sub>2</sub> did not aggregate in the root cells. | (71) |
| Grap hene quan tum dots        | 200 mg/L         | 3 h       | Water             | Coriand er and garlic     | Seedlin g growth                       | Enhanced growth rate (e.g., leave length, root length or weight, shoots, flowers and fruits) of coriander and garlic plants                                                                                    | (72) |
| IAA loade d rGO                | 25 mg/L          | 7 d; 14 d | Filter paper      | Maize                     | Seedlin g growth                       | Enhanced root length, shoot length, and plant biomass.                                                                                                                                                         | (73) |

|           |                                 |             |                                  |                                      |                                                 |                                                                                                                                                                                                                       |      |
|-----------|---------------------------------|-------------|----------------------------------|--------------------------------------|-------------------------------------------------|-----------------------------------------------------------------------------------------------------------------------------------------------------------------------------------------------------------------------|------|
| GO        | 50 to 1000 mg/L                 | 14 d        | Culturing solution               | Wheat                                | Seedling growth                                 | Low concentration (100 mg/L) promoted root growth. High concentration (1000 mg/L) inhibited root growth due to oxidative stress.                                                                                      | (74) |
| GO        | 5.5 to 22 $\mu\text{g mm}^{-2}$ | 3h; 4 d     | Flower application               | Zucchini ( <i>Cucurbita pepo</i> L.) | Sexual reproduction; Seedling growth            | Airborne deposition of GO on stigma of <i>C. pepo</i> do not alter reproduction for a dose upto $11.1 \pm 3.6 \text{ ng mm}^{-2}$ .                                                                                   | (75) |
| GO        | 20 to 50 mg/L; 50 to 200 mg/L   | 16 hr, 30 d | Liquid MS media; peat moss       | Tomato                               | Root development in seedlings and mature plant  | Improved shoot/stem growth by increasing the cortical cells number, cross-sectional area, diameter, and vascular-column area.<br><br>GO induced the expression of root development-related genes (SIExt1 and LeCTR1). | (76) |
| Grap hene | 10 to 1000 mg/L                 | 60 d        | Foliar; Drench application       | Tomato                               | Biotic and Abiotic stress                       | Increased fresh and dry root weight. Improved antioxidant response of seedlings.                                                                                                                                      | (77) |
| GO        | 125 to 500 ppm                  | 10 d        | Culture medium; Soil application | Lentil                               | Root-rot fungus and root-knot nematode diseases | GO inhibited growth of <i>M. incognita</i> and <i>M. phaseolina</i>                                                                                                                                                   | (78) |

|       |                   |         |                                   |                            |                               |                                                                                                                                                                                                                                                                                                                                                                                                                                                                                                                      |      |
|-------|-------------------|---------|-----------------------------------|----------------------------|-------------------------------|----------------------------------------------------------------------------------------------------------------------------------------------------------------------------------------------------------------------------------------------------------------------------------------------------------------------------------------------------------------------------------------------------------------------------------------------------------------------------------------------------------------------|------|
| GNP   | 1000 mg/kg        | 39 d    | Sandy loam soil; Soil application | Soybean                    | Heat stress and Insect stress | GNP increased the leaf chlorophyll a/b ratio and leaf lipid peroxidation.                                                                                                                                                                                                                                                                                                                                                                                                                                            | (79) |
| GO-Ag | 3.91 to 7.81 mg/L | 5 d     | In vitro and in vivo              | Wheat seed                 | Pathogenic Fungi stress       | Enhanced antimicrobial activity compared to the pure AgNPs and GO which was caused by physical damage and oxidative stress.<br>Decreased leaf spot disease infected by <i>F. graminearum</i>                                                                                                                                                                                                                                                                                                                         | (80) |
| GO    | 30 mg/L           | 4 weeks | Hydroponic; Foliar application    | Lettuce                    | Heavy metal stress            | Decreased cadmium stress.<br><br>Increased net photosynthetic rates, stomatal conductance, transpiration rates, chlorophyll content, primary maximum photochemical efficiency of photosystem II, actual quantum yield, photosynthetic electron transport rates, ribulose-1,5-bisphosphate carboxylase and oxygenase concentrations, and biomass<br><br>Reduced the accumulation of the reactive oxygen species and H <sub>2</sub> O <sub>2</sub> , malondialdehyde content, and the activity of antioxidant enzymes. | (81) |
| GO    | 30 and 60 mg/L    | 28 d    | Hydroponic; Foliar application    | Lettuce                    | Heavy metal stress            | Increased lettuce root growth.<br>Decreased the bioaccumulation of Cd in the roots and leaves.<br>Attenuated Cd-related cell damage.<br>Improved lettuce quality (increased content of soluble sugars, proteins, and vitamin C).                                                                                                                                                                                                                                                                                     | (82) |
| GO    | 1 to 80 mg/L      | 3 d     | Filter paper/Petri dish           | <i>Lepidium sativum</i> L. | Heavy metal stress            | GO adsorb metal mixture from growth medium and thus altered heavy metals accumulation in root and shoot.                                                                                                                                                                                                                                                                                                                                                                                                             | (83) |

|                                 |                          |                 |                                              |                                          |                                             |                                                                                                                                                                                                                     |      |
|---------------------------------|--------------------------|-----------------|----------------------------------------------|------------------------------------------|---------------------------------------------|---------------------------------------------------------------------------------------------------------------------------------------------------------------------------------------------------------------------|------|
| Sulfonated graphene oxide (SGO) | 50 to 500 mg/L           | 72 h            | SGO applied in culture media                 | Wheat                                    | Nitrate Stress (NS) or Ammonium stress (AS) | Increased antioxidant activity and gas exchange parameters.                                                                                                                                                         | (84) |
| Sulfonated graphene oxide (SGO) | 50 to 500 mg/L           | 72 h            | SGO applied in culture media                 | Wheat                                    | Nitrate or Ammonium stress                  | Improved structural stability, efficiency, and photochemical reaction of PSI and PSII impaired by nitrate stress or ammonium stress in wheat chloroplasts.                                                          | (85) |
| rGO-CuO                         | 1 to 100 mg/L            | 70 d            | In vitro growth assays; Seedling application | Tomato and Peeper                        | Pathogenic Fungi stress                     | rGO-CuO exhibited superior and long-lasting antifungal activity. Improved flowering, plant height, dry weight, accumulation of photosynthetic pigments.                                                             | (86) |
| GNA                             | 3g GNA per kg fertilizer | 7-8 weeks       | Soil application                             | Lettuce                                  | Nitrate leaching and Yield                  | Reduced nitrate leaching. Improved yield                                                                                                                                                                            | (87) |
| Graphene                        | 25 to 500 mg/L           | 30, 40, or 50 d | Soil application                             | Changbai larch (Larix olgensis A. Henry) | Oxidative stress                            | Low dose of graphene increased root length, surface area, volume, and average diameter increased. At 30 ds incubation organic matter, hydrolytic nitrogen, and available phosphorus and potassium contents of soil. | (88) |

| Negative impacts |                  |               |                                              |                                      |                              |                                                                                                                                                           |            |
|------------------|------------------|---------------|----------------------------------------------|--------------------------------------|------------------------------|-----------------------------------------------------------------------------------------------------------------------------------------------------------|------------|
| Type of graphene | Application dose | Exposure time | Experimental system                          | Plant type                           | Problem caused               | Major findings                                                                                                                                            | References |
| GO, rGO          | 5 to 250 mg/L    | 21 d          | Nutrient growth solution (Hoagland solution) | Rice ( <i>Oryza sativa</i> L.)       | Toxicity                     | GO reduced shoot biomass and elongation (at 100 and 250 mg/L). rGO showed no impact on root and shoot development.                                        | (89)       |
| GO               | 40 to 2000 mg/L  | 7 to 15 d     | Nutrient growth solution (Hoagland solution) | Wheat                                | Toxicity and Bioaccumulation | Accumulation of GO in root. Hindered development of wheat plants. Disrupted root structure, cellular ultrastructure and promoted oxidative stress.        | (90)       |
| GO               | 40 to 2000 mg/L  | 15 d          | Hydroponic and soil application              | Naked oats ( <i>Avena sativa</i> L.) | Toxicity                     | Induced growth inhibition, photosynthesis disturbance and morphological changes in hydroponic culture. Lower toxicity of GO in soil culture.              | (91)       |
| GO               | 0.5 to 25 mg/L   | 10 d          | Water                                        | Brassica napus L.                    | Oxidative stress             | Inhibited root length and number of adventitious roots.                                                                                                   | (92)       |
| GO               | 0.5 to 25 mg/L   | 10 d          | Water                                        | Brassica napus L.                    | Affected plant growth        | Affected the morphology and endogenous phytohormone contents of seedlings.                                                                                | (93)       |
| GO               | 5 to 100 mg/L    | 15 d          | Water                                        | Brassica napus L.                    | Affected root development    | Decreased root length (for 25 to 100 mg/L). Decreased root fresh weight (for 50 to 100 mg/L). No significant effect on the Malondialdehyde (MDA) content. | (94)       |

|     |                     |            |                            |                                            |                  |                                                                                                                                                                                                            |       |
|-----|---------------------|------------|----------------------------|--------------------------------------------|------------------|------------------------------------------------------------------------------------------------------------------------------------------------------------------------------------------------------------|-------|
|     |                     |            |                            |                                            | ment             |                                                                                                                                                                                                            |       |
| GO  | 40 to 4000 mg/L     | 28 d       | White moss incubated in GO | White moss <i>Leucobryum glaucum</i>       | Toxicity         | GO suppressed chlorophyll contents and thus photosynthesis. At high concentration GO disturbed the microstructure and ultrastructure. GO decreased glutathione levels and catalase activities.             | (95)  |
| GO  | 0.2%, 0.4% and 0.6% | 50 & 100 d | Soil application           | White clover ( <i>Trifolium repens</i> L.) | Toxicity         | GO (at higher concentration and exposure time) decreased seedling growth, photosynthetic parameters, and nutrient uptake in shoots.                                                                        | (96)  |
| GO  | 0.2%, 0.4% and 0.6% | 100 d      | Soil application           | Alfalfa                                    |                  | Low concentration (0.2%) of GO promotes root growth. High concentration (0.4% and 0.6%) of GO damaged root structure and nutrient uptake.                                                                  | (97)  |
| GO  | 5 mg/L              | 15 d       | Hydroponic system          | Rice                                       | Oxidative stress | Cellular structures damage, GO deposition and oxidative stress was observed in rice root. Richness, evenness and diversity, relative abundance of endophytic bacterial communities of rice root decreased. | (98)  |
| GO  | 500 to 2000 mg/L    | 2 and 7 d  | Petri dish                 | Wheat                                      | Oxidative stress | Low dose exposure exhibited higher antioxidant enzyme activity (CAT, POD, and SOD). Free radical scavenging activity of polyphenolic compounds were increased.                                             | (99)  |
| rGO | 50 to 500 mg/kg     | 30 d       | Soil application           | Rice                                       | Toxicity         | Phytohormones (indoleacetic acid, brassinosteroid and gibberellin acid 4) in rice roots increased at high GO dose.                                                                                         | (100) |

|                          |                        |                |                                |                             |                                                    |                                                                                                                                                              |       |
|--------------------------|------------------------|----------------|--------------------------------|-----------------------------|----------------------------------------------------|--------------------------------------------------------------------------------------------------------------------------------------------------------------|-------|
| GO,<br>GOQ<br>Ds,<br>rGO | 0.5 to<br>50<br>mg/kg  | –              | Injection<br>to plant<br>stem  | Wheat                       | Translo<br>cation<br>from<br>stems<br>to<br>grains | Decreased the globulin, prolamin, amylose and amylopectin content.<br>Decreased the levels of mineral elements and upregulated the soluble<br>sugar content. | (101) |
| GO,<br>GOQ<br>Ds,<br>rGO | 0.25 to<br>25<br>mg/kg | 42 d           | Injection<br>to plant<br>stem  | Pepper                      | Phytoto<br>xicity                                  | Main mechanism involved in phytotoxicity is downregulation of<br>carbohydrate metabolism.<br>rGO and GOQD poses higher oxidative stress than GO.             | (102) |
| GO,<br>rGO               | 40 to<br>2000<br>mg/L  | 4d             | Nutrient<br>growth<br>solution | Pea<br>seedling             | Translo<br>cation<br>of root<br>to leaf            | rGO translocated in leaves and inhibited photosynthesis.<br>GO had no effect on photosynthesis as it was restricted to plant root.                           | (103) |
| GO                       | 10 to<br>800<br>mg/L   | 14 d           | Nutrient<br>growth<br>solution | Wheat<br>seedling           | Suppre<br>ssed<br>nitrate<br>uptake<br>by root     | Decreased root uptake area and root activity and thus suppressed the<br>nitrate uptake rate.                                                                 | (104) |
| FLG,<br>GO,<br>rGO       | 1 to<br>100<br>mg/L    | 3,<br>5.5<br>h | In vitro                       | Corylus<br>avellana<br>L.   | Sexual<br>reprodu<br>ction of<br>seed<br>plants    | FLG and GO may influence pollen germination (FLG) and pollen tube<br>growth (GO).<br>No negative impacts by rGO.                                             | (105) |
| Grap<br>hene             | 40 to<br>80<br>mg/L    | 72 h           | Growth<br>medium               | Arabido<br>psis<br>thaliana | Toxicity                                           | Caused fragmented nuclei, membrane damage, mitochondrial<br>dysfunction, increase of ROS.<br>Caused translocation of graphene into cells.                    | (106) |

|          |                  |      |                          |                                           |                            |                                                                                                                                                                                                               |       |
|----------|------------------|------|--------------------------|-------------------------------------------|----------------------------|---------------------------------------------------------------------------------------------------------------------------------------------------------------------------------------------------------------|-------|
| Graphene | 500 to 2000 mg/L | 20 d | Nutrient growth solution | Cabbage, tomato, red spinach, and lettuce | Phytotoxicity to seedlings | Graphene inhibited plant growth and biomass in a dose dependent manner.<br>Induced oxidative stress on cabbage, tomato, and red spinach.<br>Less significant toxic effect was observed for lettuce seedlings. | (107) |
|----------|------------------|------|--------------------------|-------------------------------------------|----------------------------|---------------------------------------------------------------------------------------------------------------------------------------------------------------------------------------------------------------|-------|

**Table S.3: Transport of GNMs in porous media**

| Graphene type      | Transport medium           | What was assessed?                                                                                      | Experimental condition                                                                | Major outcomes                                                                                                                                                                                                                      | Reference |
|--------------------|----------------------------|---------------------------------------------------------------------------------------------------------|---------------------------------------------------------------------------------------|-------------------------------------------------------------------------------------------------------------------------------------------------------------------------------------------------------------------------------------|-----------|
| GO (300 to 800 nm) | Quartz Sand (0.21–0.30 mm) | Deposition & remobilization of GO particles within saturated sand packs as a function of ionic strength | Saturated glass columns (2.5 cm dia and 15 cm length)<br><br>IS: 1,5,20,100 mM (NaCl) | -The transport behavior of GO in saturated sand packs could be described by a Langmuir-type model.<br>-GO particles displayed high mobility at low IS condition and high immobilization at high IS.<br>-GO retention is reversible. | (108)     |

|                                                                                                        |                               |                                                                                                                                 |                                                                                                                                        |                                                                                                                                                                                                                                                                                                  |       |
|--------------------------------------------------------------------------------------------------------|-------------------------------|---------------------------------------------------------------------------------------------------------------------------------|----------------------------------------------------------------------------------------------------------------------------------------|--------------------------------------------------------------------------------------------------------------------------------------------------------------------------------------------------------------------------------------------------------------------------------------------------|-------|
| GO<br>(avg. square root surface area of $179.3 \pm 111.5$ nm and average height of $0.86 \pm 0.21$ nm) | Quartz Sand (0.25 to 0.30 mm) | Effects of solution chemistry on transport of GO.                                                                               | Saturated borosilicate glass column (dia: 1.5 cm and length: 5 cm)<br><br>IS: 1 to 100 mM (KCl)                                        | -Transport of GO is IS dependent. At 10 and 100 mM KCl, around 7% and 95% of the GO were deposited (in the first cm of column) respectively.                                                                                                                                                     | (109) |
| GO<br>(1–5 $\mu$ m dia)                                                                                | Quartz Sand (0.5–0.6 mm)      | Deposition mechanisms of GO particles in porous media with various combinations of moisture content and IS.                     | Saturated acrylic column (2.5 cm in dia and 16.5 cm length)<br><br>IS: 1, 10 or 100 mM (NaCl)                                          | -GO has high mobility under saturated and unsaturated porous media under low IS.<br>-Under same IS condition, recovery rate of GO under unsaturated sand column were lower compared to saturated media.                                                                                          | (110) |
| GO<br>(N.A.)                                                                                           | Quartz Sand (0.21–0.30 mm)    | Effects of environmental factors on the aggregation and transport of GO.                                                        | Saturated borosilicate glass columns (10 cm dia, 0.66 cm length)<br><br>IS: 10, 25, 35, 50 mM (NaCl)<br>pH: 5.1; 7; 9<br>SRHA: 10 mg/L | -At high IS, GO displayed high immobilization<br>Insignificant effect of pH in GO transport.<br>-SRHA inhibited aggregation of GO and provided enhanced dispersion and mobility.<br>-Higher flow velocity resulted higher mobility of GO when IS was high. No impact of flow velocity at low IS. | (111) |
| GO<br>(Thickness: 0.8 and 1.2 nm)                                                                      | Quartz sand (26–30 mesh)      | Effects of biofilm (Gram-positive B. subtilis and Gram-negative P. putida) and EPS (polysaccharide and protein) on GO transport | Saturated glass chromatography columns (2.6-cm dia and 20-cm length).<br><br>IS: 1, 10, 50 mM (NaCl)                                   | -For biofilm coated sand column: Enhanced GO retention due to surface roughness and physical straining of the biofilm.<br><br>-For EPS coated sand column: Negligible influence on GO transport.                                                                                                 | (112) |

|                                                                                            |                                                                                 |                                                                                                   |                                                                                                                                                      |                                                                                                                                                                                                                                                                                                                                                                                                                           |       |
|--------------------------------------------------------------------------------------------|---------------------------------------------------------------------------------|---------------------------------------------------------------------------------------------------|------------------------------------------------------------------------------------------------------------------------------------------------------|---------------------------------------------------------------------------------------------------------------------------------------------------------------------------------------------------------------------------------------------------------------------------------------------------------------------------------------------------------------------------------------------------------------------------|-------|
| GO (thickness: $0.92 \pm 0.13$ nm and average square root of the area: $582 \pm 111.2$ nm) | Quartz sand (fine (0.1-0.2 mm), medium (0.5-0.6 mm), and coarse (0.85-1.0 mm)). | Effect of input concentration and grain size on transport, retention, and size perturbation of GO | Saturated acrylic columns (2.5 cm inner diameter, 16.7 cm length)                                                                                    | -Mobility of GO in the sand columns reduced with decreasing grain size.<br>-Input concentration also influenced the retention and transport of GO in the sand columns because of the 'blocking' mechanism that reduces the particle retention rate.<br>-After passing through the column, average GO sizes increased dramatically. In addition, the sizes of GO retained in the sand also increased with travel distance. | (113) |
| GO (dia 237 to 1113 nm)<br><br>rGO (dia 237 to 1652 nm)                                    | Quartz sand (0.21–0.30 mm)                                                      | Effect of cation (monovalent & divalent), pH, SRHA on GO and sulfide reduced rGO transport        | Saturated borosilicate glass columns (10 cm × 0.66 cm)<br><br>IS: 5 to 35 mM<br>NaCl 0.1 to 0.5 mM<br>CaCl <sub>2</sub><br>pH: 5,7,9<br>SRHA: 5 mg/L | - <i>When Na<sup>+</sup> was the background cation:</i><br>Increasing pH (which increased the accumulation of large hydrated Na <sup>+</sup> ions on grain surface) and the presence of SRHA significantly enhanced the transport of RGO, mainly due to steric hindrance.<br><br>- <i>When Ca<sup>2+</sup> was background cation:</i><br>pH and SRHA had little effect (neither affected cation bridging)                 | (114) |
| GO (N.A.)                                                                                  | Quartz sand (0.417 to 0.60 mm)                                                  | Effect of gravity on GO transport                                                                 | Plexiglas columns (dia:2 cm; length: 10 cm)                                                                                                          | -Gravity had negligible effect on the transport and retention of carbon-based NPs (e.g., GO).                                                                                                                                                                                                                                                                                                                             | (115) |
| GO (N.A.)                                                                                  | Quartz sand (0.36–0.60 mm)                                                      | Impact of cation composition in mixed Na–Ca electrolyte systems on the transport of GO            | Saturated acrylic column (dia 4 cm; length 20 cm)                                                                                                    | -The molar ratio of Ca <sup>2+</sup> /Na <sup>+</sup> in solution was important for altered particle retention behavior at the higher IS of 10mM, compared with little influence at 1mM.                                                                                                                                                                                                                                  | (116) |

|                                                   |                                       |                                                                                                                     |                                                                                                                    |                                                                                                                                                                                                                                                                                                                                                           |       |
|---------------------------------------------------|---------------------------------------|---------------------------------------------------------------------------------------------------------------------|--------------------------------------------------------------------------------------------------------------------|-----------------------------------------------------------------------------------------------------------------------------------------------------------------------------------------------------------------------------------------------------------------------------------------------------------------------------------------------------------|-------|
| GO: 1–5 $\mu\text{m}$ , and thickness 0.8–1.2 nm. | Quartz Sand: 110 to 850 $\mu\text{m}$ | To assess fate of GO in saturated and unsaturated structured heterogeneous sand columns                             | Vertical acrylic columns:<br>Saturated: 20 cm long and 2.5 cm dia;<br>Unsaturated: 16.7 cm long and 2.6 cm dia     | -GO retention and transport in all the heterogeneous columns were dominated by the preferential flow phenomena.                                                                                                                                                                                                                                           | (117) |
| GO (?)                                            | Quartz sand (0.60 to 0.71 mm)         | Impact of (Gram-positive <i>B. subtilis</i> and Gram-negative <i>P. putida</i> ) biofilms on the transport of GONPs | Saturated Glass column (dia 2.6-cm and length 20-cm)<br><br>IS: (0.1, 0.5, and 1.0 mM $\text{CaCl}_2$ )<br>pH: 7.2 | -Biofilms reduced the porosity and narrowed the pore sizes of sand columns.<br>-The presence of biofilms provides favorable sites for GONPs retention/ attachment.                                                                                                                                                                                        | (118) |
| GO (N.A.)                                         | Quartz sand (0.18–0.25 mm)            | Effect of clay minerals (kaolinite, montmorillonite, and illite) on GO transport                                    | Saturated glass columns (dia: 0.66 cm and length: 10 cm)                                                           | -Presence of clay minerals (kaolinite, montmorillonite, and illite) inhibited the transport of GO.<br>-Transport inhibition was exerted mainly by the presence of positively charged sites on clay edges (which served as favorable deposition sites), whereas the effects on the overall particle–collector interaction energy and flow path were small. | (119) |
| FLG (N.A.)                                        | Quartz sand (0.25–0.30 mm)            | Effect of IS on deposition, mobilization, and transport of $^{14}\text{C}$ -labeled few-layer graphene (FLG)        | Saturated acrylic columns (5.2 x 1.5 cm)<br><br>IS: 1-100 mM $\text{NaCl}$                                         | -FLG is relatively mobile at low IS (e.g., <10 mmol/L); however, increasing in IS will greatly enhance its retention due to concurrent agglomeration and straining.<br>-Electrostatic and steric repulsion from the adsorbed organic macromolecules on FLG effectively reduced agglomeration and thus enhanced transport and release of FLG.              | (120) |

|                                                                |                                                                |                                                                                                                          |                                                                                        |                                                                                                                                                                                                                                                                                                                                                                                                                                                                                                                                                                                          |       |
|----------------------------------------------------------------|----------------------------------------------------------------|--------------------------------------------------------------------------------------------------------------------------|----------------------------------------------------------------------------------------|------------------------------------------------------------------------------------------------------------------------------------------------------------------------------------------------------------------------------------------------------------------------------------------------------------------------------------------------------------------------------------------------------------------------------------------------------------------------------------------------------------------------------------------------------------------------------------------|-------|
| GO (dia 1–5 $\mu\text{m}$ and thickness 0.8–1.2 nm)            | Quartz sand (Fine: 0.3–0.4 mm and coarse: 0.9–1.0 mm)          | Effect of T (6 and 24 degree C) on GO transport                                                                          | Saturated acrylic column (2.5 cm inner diameter and 12.5 cm length)                    | -At low IS: Temperature had little effect on GO retention and transport in porous media<br>-At high IS: Temperature showed notable effects on GO retention and transport                                                                                                                                                                                                                                                                                                                                                                                                                 | (121) |
| GO (diameter of 1-5 $\mu\text{m}$ and thickness of 0.8-1.2 nm) | Limestone media (0.70 to 0.90 mm)                              | To assess transport of GO in limestone media under various electrolytes, solution, pH, and humic acid (HA) concentration | Polytetrafluoroethylene columns (2.5 cm dia and 12.0 cm height)                        | -GO mobility in limestone media increased with the increasing solution pH and HA concentrations, but the decreasing ionic strength.<br>-In comparison to $\text{Cl}^-$ , $\text{S}^{2-}$ in the electrolyte solution enhanced GO mobility in limestone media.                                                                                                                                                                                                                                                                                                                            | (122) |
| GO (dia 0.8-3 mm, thickness 0.8-1.2 nm)                        | Glass beads (Fine: 53-70 $\mu\text{m}$ ; coarse: 0.60-0.85 mm) | Effect of IS on GO transport in packed columns (both homogeneous & heterogeneous)                                        | Saturated acrylic columns (12.4 cm long and 2.2 cm dia)<br><br>IS: 1, 20, 50 mM (NaCl) | -In homogeneous media:<br>GO particles exhibited <i>high mobility</i> in both fine and coarse beads at low IS (1 mM), but <i>higher mobility</i> was observed in coarse media than that in fine media at high IS (20 and 50 mM) conditions.<br><br>-In heterogeneous media:<br>For uniform coarse-fine grain mixture, the transport and retention behavior of GO particles was also similar to that in the fine media.<br>Heterogeneous media with layered structure or large pore channel could produce a preferential flow, which ultimately accelerated the GO transport in the media | (123) |

|                                                          |                                         |                                                                                                                                                 |                                                                                                                                                                                                                                               |                                                                                                                                                                                                                                                                                                                                                                   |       |
|----------------------------------------------------------|-----------------------------------------|-------------------------------------------------------------------------------------------------------------------------------------------------|-----------------------------------------------------------------------------------------------------------------------------------------------------------------------------------------------------------------------------------------------|-------------------------------------------------------------------------------------------------------------------------------------------------------------------------------------------------------------------------------------------------------------------------------------------------------------------------------------------------------------------|-------|
| GO (thickness 0.8 to 1.2 nm)                             | Quartz sand (0.21–0.43 mm)              | Effect of flow velocity on transport of GO                                                                                                      | Saturated acrylic columns (dia 2 cm and length 9 cm)<br>IS: 1, 10, 50 mM KCL or 0.1, 0.5, or 1 mM CaCl <sub>2</sub> ;<br>Flow velocities (9.45 x 10 <sup>-5</sup> , 1.89 x 10 <sup>-4</sup> , and 3.78 x 10 <sup>-4</sup> m s <sup>-1</sup> ) | -Attachment efficiency increased with increasing flow velocity (IFV) for the sheet-shaped GO. This increased attachment efficiency with IFV was attributed to the enhanced approaching and subsequent deposition of the GO at concave surfaces.                                                                                                                   | (124) |
| GO (N.A.)                                                | Quartz sand (0.25–.40 mm)               | Effects of Mf-SRNOMs on the aggregation and transport of GO in aqueous media and saturated porous media were investigated.                      | Saturated glass column (dia 1.8 cm; length 10 cm)<br>Concentrations of GO and pristine-/Mf-SRNOMs were 25 mg/L and 5 mg C/L.                                                                                                                  | -Stronger sorption of high MWNOMs on GO enhanced their steric hindrance effect.                                                                                                                                                                                                                                                                                   | (125) |
| Nitrogen doped graphene (NG) (2–10 µm; thickness 1–3 nm) | Quartz sand (0.3–0.4 mm and 0.5–0.6 mm) | To assess transport and retention of NG and GO and to investigate the effects of on the transport and retention of NG in saturated porous media | Saturated sand column [sand grain size (0.3–0.4 and 0.5–0.6 mm)];<br>Temperature (4 and 25 °C), solution ionic strength (1 and 5 mM)                                                                                                          | -The retention of NG was larger than GO.<br>-The transport of NG was sensitive to solution ionic strength (higher mobility under lower IS).<br>-The transport of NG increased with the increasing of sand grain size.<br>-The transport of NG was larger at the lower temperature (at high T, the repulsively electrostatic forces between sand and NG decreases) | (126) |
| GO (N.A.)                                                | Quartz sand (0.21–0.30 mm)              | To assess transport of GO in saturates quartz sand in presence of iron oxides, (goethite,                                                       | Saturated boro-silicate glass columns (10 cm length and 0.66 cm dia)                                                                                                                                                                          | -The presence of iron oxide coatings can magnify the effects of cations on GO transport via two main mechanisms:<br>-First, coating with iron oxides can increase surface area, introduce small pores, and                                                                                                                                                        | (127) |

|                                |                                 |                                                                                                                       |                                                                           |                                                                                                                                                                                                                                                                                                                                                                                                                                                                                                                                                                                                                                                                                             |       |
|--------------------------------|---------------------------------|-----------------------------------------------------------------------------------------------------------------------|---------------------------------------------------------------------------|---------------------------------------------------------------------------------------------------------------------------------------------------------------------------------------------------------------------------------------------------------------------------------------------------------------------------------------------------------------------------------------------------------------------------------------------------------------------------------------------------------------------------------------------------------------------------------------------------------------------------------------------------------------------------------------------|-------|
|                                |                                 | hematite and ferrihydrite)                                                                                            |                                                                           | change the surface charge distribution of silica.<br>-Second, iron oxides contain abundant surface hydroxyl groups that are metal-complexing moieties; thus, for cations that are able to complex with surface O-functional groups (e.g., Ca <sup>2+</sup> ), the binding of GO via the cation-bridging mechanism can be significantly enhanced.                                                                                                                                                                                                                                                                                                                                            |       |
| GO (N.A.)                      | Quartz sand (0.21–0.30 mm)      | Effect of low molecular weight organic acid (tartaric acid, malonic acid, glycolic acid, acetic acid) on GO transport | Glass column (dia 10 mm, length 10 cm)                                    | <p>-Organic acids significantly enhanced the transport of GO. Increasing the transport of GO followed the order: tartaric acid &gt; malonic acid &gt; glycolic acid &gt; acetic acid.</p> <p>-At pH 5.0: Transport-enhancement effects of organic acids are stemmed from the <i>steric hindrance</i> between the GO and quartz sand and the competition of organic acids with GO for binding sites on grain surfaces.</p> <p>-At pH 7: Differences in the breakthrough among these four LMWOAs are relatively small because the adsorbed LMWOAs can modify surface properties of GO and inhibit the deposition of nanoparticles by a combination of electrostatic and steric repulsion.</p> | (128) |
| GO: (Thickness 0.92 ± 0.13 nm) | Sand (700–850 µm or 350–450 µm) | To assess transport of GO in a 2D porous media                                                                        | Transport in a 2D sand tank (30 cm length, 20 cm height and 1.4 cm width) | <p>-GO mobility decreased with the increasing solution ionic strength (IS) and decreasing media grain size.</p> <p>-Preferential flow played an important role in GO transport in 2-D heterogeneous porous</p>                                                                                                                                                                                                                                                                                                                                                                                                                                                                              | (129) |

|                                                   |                                                                          |                                                                                                                                                                |                                                                         |                                                                                                                                                                                                                                                                                                                 |       |
|---------------------------------------------------|--------------------------------------------------------------------------|----------------------------------------------------------------------------------------------------------------------------------------------------------------|-------------------------------------------------------------------------|-----------------------------------------------------------------------------------------------------------------------------------------------------------------------------------------------------------------------------------------------------------------------------------------------------------------|-------|
|                                                   |                                                                          |                                                                                                                                                                |                                                                         | media. Even without vertical flow in the sand tanks, GO still spread vertically through dispersion.                                                                                                                                                                                                             |       |
| GO (N.A.)                                         | Quartz sand ( median grain sizes of 1090, 519, or 330 $\mu\text{m}$ )    | To assess aggregation, retention, and release behaviors of GO were investigated under different physicochemical conditions (IS, cation type, Co, and d50).     | Transport in stainless-steel column (dia 3 cm; length 12 cm)            | -Greater GO transport occurred at a lower IS, monovalent in comparison to divalent cations, lower Co, and in the coarser textured sand.                                                                                                                                                                         | (130) |
| GO (dia 1-5 $\mu\text{m}$ , thickness 0.8-1.2 nm) | Quartz sand (Size range of 0.425–0.5 mm and average diameter of 0.45 mm) | To assess the stability of GO under different temperature, cationic surfactant (CTAB) concentration, cation valence, and electrolyte concentration conditions. | Transport in acrylic column of 2.5 cm in diameter and 12.5 cm in height | -Decrease of the temperature under all the CTAB concentration and NaCl concentration conditions greatly enhanced the transport of GO.<br>-Increase in surfactant concentration effectively promoted the transport of GO in saturated porous media in both monovalent and multivalent electrolyte concentrations | (131) |
| GO (Thickness 0.7 to 2 nm; 300 to 1600 nm)        | Silica sand of 3 size ranges: coarse S1 ( d50 = 0.75 mm), medium S2      | To assess particle size (300–1200 nm), concentration (10–50 mg/L), and sand size (coarse to fine) in GO transport.                                             | Saturated plexiglass cylinder (length 15.2 cm, inner diameter 1.6 cm)   | -GO mobility in porous media strongly depends on its lateral size.<br>-GO transport is controlled by blocking and straining phenomena.                                                                                                                                                                          | (132) |

|                           |                                                  |                                                                                                                                    |                                                         |                                                                                                                                                                                                                                                                                                                                                                                                                                                                                                                                                                               |       |
|---------------------------|--------------------------------------------------|------------------------------------------------------------------------------------------------------------------------------------|---------------------------------------------------------|-------------------------------------------------------------------------------------------------------------------------------------------------------------------------------------------------------------------------------------------------------------------------------------------------------------------------------------------------------------------------------------------------------------------------------------------------------------------------------------------------------------------------------------------------------------------------------|-------|
|                           | (d50 = 0.4 mm), and fine S3 (d50 = 0.28 mm).     |                                                                                                                                    |                                                         |                                                                                                                                                                                                                                                                                                                                                                                                                                                                                                                                                                               |       |
| GO (thickness 0.8–1.2 nm) | Quartz and limestone sediments (0.25 to 0.50 mm) | To assess transport, retention and attachment behavior of GONPs with the surfaces of native aquifer by batch and column experiment | Saturated Plexiglass columns (dia 2.5 cm; length: 9 cm) | <p>-Retention rate of GO at 22 °C was higher than at 4 °C.</p> <p>-Higher GO retention onto the surfaces of collectors at higher ionic strengths and cation valence. The size- distribution analysis of retained GO showed decreasing particle diameter with increasing distance from the column inlet at high ionic strength and equal diameter at low ionic strengths.</p> <p>-GO retention rate was higher for natural porous media (compared to sand) due to the presence of metal oxides heterogeneities.</p> <p>-Biofilm acts as a biofilter and thus retains GONPs</p> | (133) |
| rGO–Pd nanosheets (N.A.)  | Pastoral soil & fine sand (<1 mm)                | To assess the migration characteristics of GO and its interaction with soil under leaching condition                               | Glass syringe                                           | <p>-Leaching and migration of nanosheets (rGO) in soil is affected by soil porosity and adsorption processes.</p> <p>-Physicochemical properties (morphology, thickness and oxygen functional groups) of rGO–Pd nanosheets changed by leaching processes.</p>                                                                                                                                                                                                                                                                                                                 | (134) |

|                                                                        |                               |                                                                                                           |                                                                                                                                                 |                                                                                                                                                                                                                                                                                                                                                                                                                 |       |
|------------------------------------------------------------------------|-------------------------------|-----------------------------------------------------------------------------------------------------------|-------------------------------------------------------------------------------------------------------------------------------------------------|-----------------------------------------------------------------------------------------------------------------------------------------------------------------------------------------------------------------------------------------------------------------------------------------------------------------------------------------------------------------------------------------------------------------|-------|
| GO (1–5 $\mu\text{m}$ lateral diameter and 0.8–1.2 nm layer thickness) | Quartz sand (0.80 to 0.90 mm) | To assess the effect of low molecular weight root exudates (CA, OA), on the stability and transport of GO | Acrylic columns (16.7 cm length, 2.5 cm dia)<br><br>pH (4.5, 7.0), ionic strength (IS: 10, 50 mM), and organic acid concentrations (10, 25 mM). | -OA and CA at high concentration accelerated the aggregation of GO and reduced the transport of GO in saturated sand media.<br>-The effect of organic acids on GO stability and transport was stronger at lower pH, higher IS, and higher organic acid concentrations.<br>-CA/OA enhanced GO mobility at relative low concentration, indicating the important role of organic acid are concentration dependent. | (135) |
|------------------------------------------------------------------------|-------------------------------|-----------------------------------------------------------------------------------------------------------|-------------------------------------------------------------------------------------------------------------------------------------------------|-----------------------------------------------------------------------------------------------------------------------------------------------------------------------------------------------------------------------------------------------------------------------------------------------------------------------------------------------------------------------------------------------------------------|-------|

### References:

1. Zhou N, Zhao Z, Wang H, Chen X, Wang M, He S, et al. The effects of graphene oxide on nitrification and N<sub>2</sub>O emission: Dose and exposure time dependent. *Environ Pollut.* 2019;252:960–6.
2. Li Y, Lu Y, Zhang W, Wu H, Zhang C, Wang L, et al. Enhanced biological nitrogen removal from sediment by graphene derivative-mediated community assembly. *Bioresour Technol.* 2020;306(March).
3. Li J, Peng Z, Hu R, Gao K, Shen C, Liu S, et al. Micro-graphite particles accelerate denitrification in biological treatment systems. *Bioresour Technol.* 2020;308(December 2019):122935.
4. Ouyang P, Liang C, Liu F, Chen Q, Yan Z, Ran J, et al. Stimulating effects of reduced graphene oxide on the growth and nitrogen fixation activity of nitrogen-fixing bacterium *Azotobacter chroococcum*. *Chemosphere.* 2022;294(January).
5. Yin X, Qiao S, Yu C, Tian T, Zhou J. Effects of reduced graphene oxide on the activities of anammox biomass and key enzymes. *Chem Eng J.* 2015;276:106–12.
6. Ruiz ON, Fernando KAS, Wang B, Brown NA, Luo PG, McNamara ND, et al. Graphene oxide: a nonspecific enhancer of cellular growth. *ACS Nano.* 2011;5(10):8100–7.
7. Luo Y, Yang X, Tan X, Xu L, Liu Z, Xiao J, et al. Functionalized graphene oxide in microbial engineering: An effective stimulator for bacterial growth. *Carbon N Y.* 2016;103:172–80.

8. Salas EC, Sun Z, Lüttge A, Tour JM. Reduction of Graphene Oxide via Bacterial Respiration. *ACS Nano*. 2010 Aug 24;4(8):4852–6.
9. Wang G, Qian F, Saltikov CW, Jiao Y, Li Y. Microbial reduction of graphene oxide by *Shewanella*. *Nano Res*. 2011 Jun 23;4(6):563–70.
10. Jiao Y, Qian F, Li Y, Wang G, Saltikov CW, Gralnick JA. Deciphering the Electron Transport Pathway for Graphene Oxide Reduction by *Shewanella oneidensis* MR-1. *J Bacteriol*. 2011 Jul 15;193(14):3662–5.
11. Guo Z, Xie C, Zhang P, Zhang J, Wang G, He X, et al. Toxicity and transformation of graphene oxide and reduced graphene oxide in bacteria biofilm. *Sci Total Environ*. 2017;580:1300–8.
12. Wang D, Wang G, Zhang G, Xu X, Yang F. Using graphene oxide to enhance the activity of anammox bacteria for nitrogen removal. *Bioresour Technol*. 2013;131:527–30.
13. Akhavan O, Ghaderi E. *Escherichia coli* bacteria reduce graphene oxide to bactericidal graphene in a self-limiting manner. *Carbon N Y*. 2012;50(5):1853–60.
14. Banach-Wiśniewska A, Tomaszewski M, Hellal MS, Ziemińska-Buczyńska A. Effect of biomass immobilization and reduced graphene oxide on the microbial community changes and nitrogen removal at low temperatures. *Sci Rep*. 2021;11(1):1–12.
15. Liu L, Zhu C, Fan M, Chen C, Huang Y, Hao Q, et al. Oxidation and degradation of graphitic materials by naphthalene-degrading bacteria. *Nanoscale*. 2015;7(32):13619–28.
16. Yilihamu A, Ouyang B, Ouyang P, Bai Y, Zhang Q, Shi M, et al. Interaction between graphene oxide and nitrogen-fixing bacterium *Azotobacter chroococcum*: Transformation, toxicity and nitrogen fixation. *Carbon N Y*. 2020;160:5–13.
17. Dong Q, Liu Y, Shi H, Huang X. Effects of graphite nanoparticles on nitrification in an activated sludge system. *Chemosphere*. 2017;182:231–7.
18. Barrios AC, Wang Y, Gilbertson LM, Perreault F. Structure-Property-Toxicity Relationships of Graphene Oxide: Role of Surface Chemistry on the Mechanisms of Interaction with Bacteria. *Environ Sci Technol*. 2019;53(24):14679–87.
19. Barrios AC, Cahue YP, Wang Y, Geiger J, Puerari RC, Matias WG, et al. Emerging investigator series: a multispecies analysis of the relationship between oxygen content and toxicity in graphene oxide. *Environ Sci Nano*. 2021;8(6):1543–59.
20. Akhavan O, Ghaderi E. Toxicity of graphene and graphene oxide nanowalls against bacteria. *ACS Nano*. 2010;4(10):5731–6.

21. Mejías Carpio IE, Santos CM, Wei X, Rodrigues DF. Toxicity of a polymer-graphene oxide composite against bacterial planktonic cells, biofilms, and mammalian cells. *Nanoscale*. 2012;4(15):4746–56.
22. Liu S, Zeng TH, Hofmann M, Burcombe E, Wei J, Jiang R, et al. Antibacterial activity of graphite, graphite oxide, graphene oxide, and reduced graphene oxide: Membrane and oxidative stress. *ACS Nano*. 2011;5(9):6971–80.
23. Chen J, Peng H, Wang X, Shao F, Yuan Z, Han H. Graphene oxide exhibits broad-spectrum antimicrobial activity against bacterial phytopathogens and fungal conidia by intertwining and membrane perturbation. *Nanoscale*. 2014;6(3):1879–89.
24. Zhang X, Cao H, Wang J, Li F, Zhao J. Graphene Oxide Exhibits Antifungal Activity against *Bipolaris sorokiniana* In Vitro and In Vivo. *Microorganisms*. 2022 Oct 9;10(10):1994.
25. Wang X, Peng F, Cheng C, Chen L, Shi X, Gao X, et al. Synergistic Antifungal Activity of Graphene Oxide and Fungicides against *Fusarium Head Blight* In Vitro and In Vivo. *Nanomaterials*. 2021 Sep 14;11(9):2393.
26. Suarez-Diez M, Porras S, Laguna-Teno F, Schaap PJ, Tamayo-Ramos JA. Toxicological response of the model fungus *Saccharomyces cerevisiae* to different concentrations of commercial graphene nanoplatelets. *Sci Rep*. 2020 Dec 24;10(1):3232.
27. Nguyen HN, Chaves-Lopez C, Oliveira RC, Paparella A, Rodrigues DF. Cellular and metabolic approaches to investigate the effects of graphene and graphene oxide in the fungi *Aspergillus flavus* and *Aspergillus niger*. *Carbon* N Y. 2019;143:419–29.
28. Liu Y, Ma H, Huang J, Li Z, Pan Y, Du Y. Carbonaceous nanomaterials stimulate extracellular enzyme release by the fungus *Cladosporium* sp. and enhance extracellular electron transfer to facilitate lignin biodegradation. *Sci Total Environ*. 2019 Dec;696(174):134072.
29. Yang H, Feng S, Ma Q, Ming Z, Bai Y, Chen L, et al. Influence of reduced graphene oxide on the growth, structure and decomposition activity of white-rot fungus *Phanerochaete chrysosporium*. *RSC Adv*. 2018;8(9):5026–33.
30. Zhu S, Luo F, Zhu B, Wang G-X. Toxicological effects of graphene oxide on *Saccharomyces cerevisiae*. *Toxicol Res (Camb)*. 2017;6(4):535–43.
31. Wang X, Cai A, Wen X, Jing D, Qi H, Yuan H. Graphene oxide-Fe<sub>3</sub>O<sub>4</sub> nanocomposites as high-performance antifungal agents against *Plasmopara viticola*. *Sci China Mater*. 2017 Mar 20;60(3):258–68.
32. Xie J, Ming Z, Li H, Yang H, Yu B, Wu R, et al. Toxicity of graphene oxide to white rot fungus *Phanerochaete chrysosporium*. *Chemosphere*. 2016;151:324–31.
33. Wang X, Liu X, Chen J, Han H, Yuan Z. Evaluation and mechanism of antifungal effects of carbon nanomaterials in

- controlling plant fungal pathogen. *Carbon N Y.* 2014;68:798–806.
34. Sawangphruk M, Srimuk P, Chiochan P, Sangsri T, Siwayaprahm P. Synthesis and antifungal activity of reduced graphene oxide nanosheets. *Carbon N Y.* 2012;50(14):5156–61.
  35. Wang X, Liu C, Li H, Zhang H, Ma R, Zhang Q, et al. Metabonomics-assisted label-free quantitative proteomic and transcriptomic analysis reveals novel insights into the antifungal effect of graphene oxide for controlling: *Fusarium graminearum*. *Environ Sci Nano.* 2019;6(11):3401–21.
  36. Cruces E, Barrios AC, Cahue YP, Januszewski B, Gilbertson LM, Perreault F. Similar toxicity mechanisms between graphene oxide and oxidized multi-walled carbon nanotubes in *Microcystis aeruginosa*. *Chemosphere.* 2021;265:129137.
  37. Malina T, Maršáľková E, Holá K, Tuček J, Scheibe M, Zbořil R, et al. Toxicity of graphene oxide against algae and cyanobacteria: Nanoblade-morphology-induced mechanical injury and self-protection mechanism. *Carbon N Y.* 2019 Dec;155:386–96.
  38. Zhao J, Cao X, Wang Z, Dai Y, Xing B. Mechanistic understanding toward the toxicity of graphene-family materials to freshwater algae. *Water Res.* 2017 Mar;111:18–27.
  39. Du S, Zhang P, Zhang R, Lu Q, Liu L, Bao X, et al. Reduced graphene oxide induces cytotoxicity and inhibits photosynthetic performance of the green alga *Scenedesmus obliquus*. *Chemosphere.* 2016;164:499–507.
  40. Hu X, Ouyang S, Mu L, An J, Zhou Q. Effects of Graphene Oxide and Oxidized Carbon Nanotubes on the Cellular Division, Microstructure, Uptake, Oxidative Stress, and Metabolic Profiles. *Environ Sci Technol.* 2015;49(18):10825–33.
  41. Ouyang S, Hu X, Zhou Q. Envelopment-Internalization Synergistic Effects and Metabolic Mechanisms of Graphene Oxide on Single-Cell *Chlorella vulgaris* Are Dependent on the Nanomaterial Particle Size. *ACS Appl Mater Interfaces.* 2015;7(32):18104–12.
  42. Zhang Y, Qin L, Sun J, Chen L, Jia L, Zhao J, et al. Metabolite changes associated with earthworms (*Eisenia fetida*) graphene exposure revealed by matrix-assisted laser desorption/ionization mass spectrometry imaging. *Ecotoxicol Environ Saf.* 2020 Dec;205(July):111102.
  43. Zhang H, Vidonish J, Lv W, Wang X, Alvarez P. Differential histological, cellular and organism-wide response of earthworms exposed to multi-layer graphenes with different morphologies and hydrophobicity. *Environ Pollut.* 2020;263:114468.
  44. Zhao S, Wang Y, Duo L. Biochemical toxicity, lysosomal membrane stability and DNA damage induced by

graphene oxide in earthworms. *Environ Pollut*. 2021 Jan;269:116225.

45. Duo L, Wang Y, Zhao S. Individual and histopathological responses of the earthworm (*Eisenia fetida*) to graphene oxide exposure. *Ecotoxicol Environ Saf*. 2022 Jan;229:113076.
46. Mao L, Liu C, Lu K, Su Y, Gu C, Huang Q, et al. Exposure of few layer graphene to *Limnodrilus hoffmeisteri* modifies the graphene and changes its bioaccumulation by other organisms. *Carbon N Y*. 2016 Nov;109:566–74.
47. Xu K, Wang X, Lu C, Liu Y, Zhang D, Cheng J. Toxicity of three carbon-based nanomaterials to earthworms: Effect of morphology on biomarkers, cytotoxicity, and metabolomics. *Sci Total Environ*. 2021 Jul;777:146224.
48. ZHAO S, BAI X, MOU M, DUO L. Carbon nanomaterial addition changes soil nematode community in a tall fescue mesocosm. *Pedosphere*. 2022;32(5):777–84.
49. Bai X, Zhao S, Duo L. Impacts of carbon nanomaterials on the diversity of microarthropods in turfgrass soil. *Sci Rep*. 2017;7(1):1–6.
50. Wang X, Xie H, Wang Z, He K. Graphene oxide as a pesticide delivery vector for enhancing acaricidal activity against spider mites. *Colloids Surfaces B Biointerfaces*. 2019;173(October 2018):632–8.
51. Chen Z, Niu J, Guo Z, Sui X, Xu N, Kareem HA, et al. Graphene enhances photosynthesis and the antioxidative defense system and alleviates salinity and alkalinity stresses in alfalfa (*Medicago sativa* L.) by regulating gene expression. *Environ Sci Nano*. 2021;8(9):2731–48.
52. Zhao D, Fang Z, Tang Y, Tao J. Graphene Oxide as an Effective Soil Water Retention Agent Can Confer Drought Stress Tolerance to *Paeonia ostii* without Toxicity. 2020;
53. Pandey K, Anas M, Hicks VK, Green MJ, Khodakovskaya M V. Improvement of Commercially Valuable Traits of Industrial Crops by Application of Carbon-based Nanomaterials. *Sci Rep*. 2019;9(1):1–14.
54. Mahmoud NE, Abdelhameed RM. Plant Stress Superiority of modified graphene oxide for enhancing the growth , yield , and antioxidant potential of pearl millet ( *Pennisetum glaucum* L .) under salt stress ☆. *Plant Stress*. 2021;2:100025.
55. Pandey K, Lahiani MH, Hicks VK, Keith Hudson M, Green MJ, Khodakovskaya M. Effects of carbon-based nanomaterials on seed germination, biomass accumulation and salt stress response of bioenergy crops. *PLoS One*. 2018;13(8):1–17.
56. Wang S, Liu Y, Wang X, Xiang H, Kong D, Wei N, et al. Effects of concentration-dependent graphene on maize seedling development and soil nutrients. *Sci Rep*. 2023 Feb 14;13(1):2650.
57. Aazami MA, Mehrabani LV, Hashemi T, Hassanpouraghdam MB, Rasouli F. Soil-based nano-graphene oxide and

foliar selenium and nano-Fe influence physiological responses of “Sultana” grape under salinity. *Sci Rep*. 2022 Dec 10;12(1):4234.

58. Golkar P, Abdollahi Bakhtiari M, Bazarganipour M. The effects of nanographene oxide on the morpho-biochemical traits and antioxidant activity of *Lepidium sativum* L. under in vitro salinity stress. *Sci Hortic (Amsterdam)*. 2021 Oct;288(November 2020):110301.
59. Zhang X, Cao H, Wang H, Zhang R, Jia H, Huang J, et al. Effects of graphene on morphology, microstructure and transcriptomic profiling of *Pinus tabuliformis* Carr. roots. Aceto S, editor. *PLoS One*. 2021 Jul 8;16(7):e0253812.
60. Ghorbanpour M, Khaltabadi Farahani AH, Hadian J. Potential toxicity of nano-graphene oxide on callus cell of *Plantago major* L. under polyethylene glycol-induced dehydration. *Ecotoxicol Environ Saf*. 2018 Feb;148(August 2017):910–22.
61. Park S, Choi KS, Kim S, Gwon Y, Kim J. Graphene Oxide-Assisted Promotion of Plant Growth and Stability. *Nanomaterials*. 2020 Apr 15;10(4):758.
62. Zhang M, Gao B, Chen J, Li Y. Effects of graphene on seed germination and seedling growth. *J Nanoparticle Res*. 2015 Feb 6;17(2):78.
63. He Y, Hu R, Zhong Y, Zhao X, Chen Q, Zhu H. Graphene oxide as a water transporter promoting germination of plants in soil. *Nano Res*. 2018;11(4):1928–37.
64. Lahiani MH, Dervishi E, Ivanov I, Chen J, Khodakovskaya M. Comparative study of plant responses to carbon-based nanomaterials with different morphologies. *Nanotechnology*. 2016;27(26).
65. Hu X, Zhou Q. Novel hydrated graphene ribbon unexpectedly promotes aged seed germination and root differentiation. *Sci Rep*. 2014;4:1–9.
66. Anjum NA, Singh N, Singh MK, Sayeed I, Duarte AC, Pereira E, et al. Single-bilayer graphene oxide sheet impacts and underlying potential mechanism assessment in germinating faba bean (*Vicia faba* L.). *Sci Total Environ*. 2014 Feb;472:834–41.
67. Anjum NA, Singh N, Singh MK. Single-bilayer graphene oxide sheet tolerance and glutathione redox system significance assessment in faba bean ( *Vicia faba* L .). 2013;
68. Li F, Sun C, Li X, Yu X, Luo C, Shen Y, et al. The effect of graphene oxide on adventitious root formation and growth in apple. *Plant Physiol Biochem*. 2018 Aug;129(March):122–9.
69. Zhang X, Cao H, Zhao J, Wang H, Xing B, Chen Z, et al. Graphene oxide exhibited positive effects on the growth of *Aloe vera* L. *Physiol Mol Biol Plants*. 2021;27(4):815–24.

70. Chen Z, Zhao J, Song J, Han S, Du Y, Qiao Y, et al. Influence of graphene on the multiple metabolic pathways of Zea mays roots based on transcriptome analysis. Wang W, editor. PLoS One. 2021 Jan 4;16(1):e0244856.
71. Chen J, Yang L, Li S, Ding W. Various Physiological Response to Graphene Oxide and Amine-Functionalized Graphene Oxide in Wheat (*Triticum aestivum*). *Molecules*. 2018 May 7;23(5):1104.
72. Chakravarty D, Erande MB, Late DJ. Graphene quantum dots as enhanced plant growth regulators: Effects on coriander and garlic plants. *J Sci Food Agric*. 2015;95(13):2772–8.
73. Bhattacharya N, Kochar M, Bohidar HB, Yang W, Cahill DM. Biologically Synthesized and Indole Acetic Acid-Loaded Graphene as Biostimulants for Maize Growth Enhancement. *ACS Agric Sci Technol*. 2023 May 15;3(5):432–44.
74. Ren W, Chang H, Li L, Teng Y. Effect of Graphene Oxide on Growth of Wheat Seedlings: Insights from Oxidative Stress and Physiological Flux. *Bull Environ Contam Toxicol*. 2020 Jul 26;105(1):139–45.
75. Zanelli D, Candotto Carniel F, Fortuna L, Pavoni E, Jehová González V, Vázquez E, et al. Interactions of airborne graphene oxides with the sexual reproduction of a model plant: When production impurities matter. *Chemosphere*. 2023 Jan;312(November 2022):137138.
76. Guo X, Zhao J, Wang R, Zhang H, Xing B, Naeem M, et al. Plant Physiology and Biochemistry Effects of graphene oxide on tomato growth in different stages. *Plant Physiol Biochem*. 2021;162(March):447–55.
77. González-García Y, López-Vargas ER, Cadenas-Pliego G, Benavides-Mendoza A, González-Morales S, Robledo-Olivo A, et al. Impact of carbon nanomaterials on the antioxidant system of Tomato seedlings. *Int J Mol Sci*. 2019;20(23).
78. Guroo JA, Khan M, Ahmad A, Azam A, Siddiqui ZA. Management of *Meloidogyne incognita* and *Macrophomina phaseolina* by Graphene Oxide on *Lens culinaris*. *Acta Phytopathol Entomol Hungarica*. 2016 Jun;51(1):43–56.
79. Wang Y, Welch ZS, Ramirez AR, Bouchard DC, Schimel JP, Gardea-Torresdey JL, et al. Effects of carbonaceous nanomaterials on soil-grown soybeans under combined heat and insect stresses. *Environ Chem*. 2019;16(6):482.
80. Chen J, Sun L, Cheng Y, Lu Z, Shao K, Li T, et al. Graphene Oxide-Silver Nanocomposite: Novel Agricultural Antifungal Agent against *Fusarium graminearum* for Crop Disease Prevention. *ACS Appl Mater Interfaces*. 2016;8(36):24057–70.
81. Gao M, Chang X, Yang Y, Song Z. Foliar graphene oxide treatment increases photosynthetic capacity and reduces oxidative stress in cadmium-stressed lettuce. *Plant Physiol Biochem*. 2020;154(February):287–94.
82. Gao M, Xu Y, Chang X, Dong Y, Song Z. Effects of foliar application of graphene oxide on cadmium uptake by

- lettuce. *J Hazard Mater.* 2020;398(May):122859.
83. Kazlauskas M, Jurgelėnė Ž, Šemčuk S, Jokšas K, Kazlauskienė N, Montvydienė D. Effect of graphene oxide on the uptake, translocation and toxicity of metal mixture to *Lepidium sativum* L. plants: Mitigation of metal phytotoxicity due to nanosorption. *Chemosphere.* 2023 Jan;312(November 2022):137221.
  84. Ozfidan-Konakci C, Yildiztugay E, Cavusoglu H, Arikan B, Elbasan F, Kucukoduk M, et al. Influences of sulfonated graphene oxide on gas exchange performance, antioxidant systems and redox states of ascorbate and glutathione in nitrate and/or ammonium stressed-wheat ( *Triticum aestivum* L.). *Environ Sci Nano.* 2021;8(11):3343–64.
  85. Yildiztugay E, Ozfidan-Konakci C, Cavusoglu H, Arikan B, Alp FN, Elbasan F, et al. Nanomaterial sulfonated graphene oxide advances the tolerance against nitrate and ammonium toxicity by regulating chloroplastic redox balance, photochemistry of photosystems and antioxidant capacity in *Triticum aestivum*. *J Hazard Mater.* 2022 Feb;424(PA):127310.
  86. El-Abeid SE, Ahmed Y, Daròs JA, Mohamed MA. Reduced graphene oxide nanosheet-decorated copper oxide nanoparticles: A potent antifungal nanocomposite against fusarium root rot and wilt diseases of tomato and pepper plants. *Nanomaterials.* 2020;10(5).
  87. Pandorf M, Pourzahedi L, Gilbertson L, Lowry G V., Herckes P, Westerhoff P. Graphite nanoparticle addition to fertilizers reduces nitrate leaching in growth of lettuce ( *Lactuca sativa*). *Environ Sci Nano.* 2020;7(1):127–38.
  88. Song J, Cao K, Duan C, Luo N, Cui X. Effects of graphene on *larix olgensis* seedlings and soil properties of haplic cambisols in Northeast China. *Forests.* 2020;11(3):1–16.
  89. Zhang P, Guo Z, Luo W, Monikh FA, Xie C, Valsami-Jones E, et al. Graphene Oxide-Induced pH Alteration, Iron Overload, and Subsequent Oxidative Damage in Rice (*Oryza sativa* L.): A New Mechanism of Nanomaterial Phytotoxicity. *Environ Sci Technol.* 2020;54(6):3181–90.
  90. Chen L, Wang C, Li H, Qu X, Yang S-T, Chang X-L. Bioaccumulation and Toxicity of <sup>13</sup>C-Skeleton Labeled Graphene Oxide in Wheat. *Environ Sci Technol.* 2017 Sep 5;51(17):10146–53.
  91. Chen L, Yang S, Liu Y, Mo M, Guan X, Huang L, et al. Toxicity of graphene oxide to naked oats ( *Avena sativa* L.) in hydroponic and soil cultures. *RSC Adv.* 2018;8(28):15336–43.
  92. Xie L, Chen F, Du H, Zhang X, Wang X, Yao G, et al. Graphene oxide and indole-3-acetic acid cotreatment regulates the root growth of *Brassica napus* L. via multiple phytohormone pathways. *BMC Plant Biol.* 2020;20(1):1–12.
  93. Xie L-L, Chen F, Zou X-L, Shen S-S, Wang X-G, Yao G-X, et al. Graphene oxide and ABA cotreatment regulates

- root growth of *Brassica napus* L. by regulating IAA/ABA. *J Plant Physiol.* 2019 Sep;240(July):153007.
94. Cheng F, Liu YF, Lu GY, Zhang XK, Xie LL, Yuan CF, et al. Graphene oxide modulates root growth of *Brassica napus* L. and regulates ABA and IAA concentration. *J Plant Physiol.* 2016;193:57–63.
  95. Lin X, Chen L, Hu X, Feng S, Huang L, Quan G, et al. Toxicity of graphene oxide to white moss *Leucobryum glaucum*. *RSC Adv.* 2017;7(79):50287–93.
  96. Zhao S, Zhu X, Mou M, Wang Z, Duo L. Assessment of graphene oxide toxicity on the growth and nutrient levels of white clover (*Trifolium repens* L.). *Ecotoxicol Environ Saf.* 2022 Apr;234(November 2021):113399.
  97. Zhao S, Wang W, Chen X, Gao Y, Wu X, Ding M, et al. Graphene oxide affected root growth, anatomy, and nutrient uptake in alfalfa. *Ecotoxicol Environ Saf.* 2023;250(July 2022):114483.
  98. Du J, Wang T, Zhou Q, Hu X, Wu J, Li G, et al. Graphene oxide enters the rice roots and disturbs the endophytic bacterial communities. *Ecotoxicol Environ Saf.* 2020;192(June 2019):110304.
  99. Vochita G, Oprica L, Gherghel D, Mihai CT, Boukherroub R, Lobiuc A. Graphene oxide effects in early ontogenetic stages of *Triticum aestivum* L. seedlings. *Ecotoxicol Environ Saf.* 2019;181(June):345–52.
  100. Hao Y, Ma C, Zhang Z, Song Y, Cao W, Guo J, et al. Carbon nanomaterials alter plant physiology and soil bacterial community composition in a rice-soil-bacterial ecosystem. *Environ Pollut.* 2018;232:123–36.
  101. Li X, Mu L, Li D, Ouyang S, He C, Hu X. Effects of the size and oxidation of graphene oxide on crop quality and specific molecular pathways. *Carbon N Y.* 2018;140:352–61.
  102. Li X, Sun S, Guo S, Hu X. Identifying the Phytotoxicity and Defense Mechanisms Associated with Graphene-Based Nanomaterials by Integrating Multiomics and Regular Analysis. *Environ Sci Technol.* 2021 Jul 20;55(14):9938–48.
  103. Chen L, Wang C, Yang S, Guan X, Zhang Q, Shi M, et al. Chemical reduction of graphene enhances: In vivo translocation and photosynthetic inhibition in pea plants. *Environ Sci Nano.* 2019;6(4):1077–88.
  104. Weng Y, You Y, Lu Q, Zhong A, Liu S, Liu H, et al. Graphene oxide exposure suppresses nitrate uptake by roots of wheat seedlings. *Environ Pollut.* 2020;262:1–11.
  105. Candotto Carniel F, Fortuna L, Nepi M, Cai G, Del Casino C, Adami G, et al. Beyond graphene oxide acidity: Novel insights into graphene related materials effects on the sexual reproduction of seed plants. *J Hazard Mater.* 2020;393:122380.
  106. Begum P, Fugetsu B. Induction of cell death by graphene in *Arabidopsis thaliana* (Columbia ecotype) T87 cell suspensions. *J Hazard Mater.* 2013;260:1032–41.
  107. Begum P, Ikhtiar R, Fugetsu B. Graphene phytotoxicity in the seedling stage of cabbage, tomato, red spinach, and

- lettuce. Carbon N Y. 2011 Oct;49(12):3907–19.
108. Feriencikova L, Xu S. Deposition and remobilization of graphene oxide within saturated sand packs. J Hazard Mater. 2012 Oct;235–236:194–200.
  109. Lanphere JD, Luth CJ, Walker SL. Effects of Solution Chemistry on the Transport of Graphene Oxide in Saturated Porous Media. Environ Sci Technol. 2013 May 7;47(9):4255–61.
  110. Liu L, Gao B, Wu L, Morales VL, Yang L, Zhou Z, et al. Deposition and transport of graphene oxide in saturated and unsaturated porous media. Chem Eng J. 2013;229:444–9.
  111. Qi Z, Zhang L, Wang F, Hou L, Chen W. Factors controlling transport of graphene oxide nanoparticles in saturated sand columns. Environ Toxicol Chem. 2014;33(5):998–1004.
  112. Jian-Zhou H, Cheng-Cheng L, Deng-Jun W, Zhou D-M. Biofilms and extracellular polymeric substances mediate the transport of graphene oxide nanoparticles in saturated porous media. J Hazard Mater. 2015 Dec;300:467–74.
  113. Sun Y, Gao B, Bradford SA, Wu L, Chen H, Shi X, et al. Transport, retention, and size perturbation of graphene oxide in saturated porous media: Effects of input concentration and grain size. Water Res. 2015 Jan;68:24–33.
  114. Xia T, Fortner JD, Zhu D, Qi Z, Chen W. Transport of Sulfide-Reduced Graphene Oxide in Saturated Quartz Sand: Cation-Dependent Retention Mechanisms. Environ Sci Technol. 2015;49(19):11468–75.
  115. Cai L, Zhu J, Hou Y, Tong M, Kim H. Influence of gravity on transport and retention of representative engineered nanoparticles in quartz sand. J Contam Hydrol. 2015 Oct;181:153–60.
  116. Fan W, Jiang XH, Yang W, Geng Z, Huo MX, Liu ZM, et al. Transport of graphene oxide in saturated porous media: Effect of cation composition in mixed Na-Ca electrolyte systems. Sci Total Environ. 2015;511:509–15.
  117. Dong S, Shi X, Gao B, Wu J, Sun Y, Guo H, et al. Retention and Release of Graphene Oxide in Structured Heterogeneous Porous Media under Saturated and Unsaturated Conditions. Environ Sci Technol. 2016;50(19):10397–405.
  118. He J-Z, Wang D-J, Fang H, Fu Q-L, Zhou D-M. Inhibited transport of graphene oxide nanoparticles in granular quartz sand coated with Bacillus subtilis and Pseudomonas putida biofilms. Chemosphere. 2017 Feb;169:1–8.
  119. Lu T, Xia T, Qi Y, Zhang C, Chen W. Effects of clay minerals on transport of graphene oxide in saturated porous media. Environ Toxicol Chem. 2017 Mar;36(3):655–60.
  120. Su Y, Gao B, Mao L. Concurrent agglomeration and straining govern the transport of <sup>14</sup>C-labeled few-layer graphene in saturated porous media. Water Res. 2017 May;115:84–93.
  121. Wang M, Gao B, Tang D, Sun H, Yin X, Yu C. Effects of temperature on graphene oxide deposition and transport in

- saturated porous media. *J Hazard Mater.* 2017 Jun;331:28–35.
122. Dong S, Sun Y, Gao B, Shi X, Xu H, Wu J, et al. Retention and transport of graphene oxide in water-saturated limestone media. *Chemosphere.* 2017;180:506–12.
  123. Chen C, Shang J, Zheng X, Zhao K, Yan C, Sharma P, et al. Effect of physicochemical factors on transport and retention of graphene oxide in saturated media. *Environ Pollut.* 2018 May;236:168–76.
  124. Zhang C, Yan A, Wang G, Jin C, Chen Y, Shen C. Impact of Flow Velocity on Transport of Graphene Oxide Nanoparticles in Saturated Porous Media. *Vadose Zo J.* 2018;17(1):180019.
  125. Shen M, Hai X, Shang Y, Zheng C, Li P, Li Y, et al. Insights into aggregation and transport of graphene oxide in aqueous and saturated porous media: Complex effects of cations with different molecular weight fractionated natural organic matter. *Sci Total Environ.* 2019 Mar;656:843–51.
  126. Li D, Li C, Gao B, Li Y, Sun H, Wang M. Transport of N-doped graphene in saturated porous media. *Chem Eng J.* 2019;360(October 2018):24–9.
  127. Qi Z, Du T, Ma P, Liu F, Chen W. Transport of graphene oxide in saturated quartz sand containing iron oxides. *Sci Total Environ.* 2019;657:1450–9.
  128. Li J, Chen J, Lu T, Wang Y, Zhang H, Shang Z, et al. Effects of low-molecular weight organic acids on the transport of graphene oxide nanoparticles in saturated sand columns. *Sci Total Environ.* 2019 May;666:94–102.
  129. Dong S, Gao B, Sun Y, Guo H, Wu J, Cao S, et al. Visualization of graphene oxide transport in two-dimensional homogeneous and heterogeneous porous media. *J Hazard Mater.* 2019;369(September 2018):334–41.
  130. Liang Y, Bradford SA, Šimůnek J, Klumpp E. Mechanisms of graphene oxide aggregation, retention, and release in quartz sand. *Sci Total Environ.* 2019;656:70–9.
  131. Wang M, Yu C, Tang D, Chen J, Gao B. Effects of Surfactant and Electrolyte Concentrations, Cation Valence, and Temperature on Graphene Oxide Retention and Transport in Saturated Porous Media. *Water Air Soil Pollut.* 2019;230(1).
  132. Beryani A, Alavi Moghaddam MR, Tosco T, Bianco C, Hosseini SM, Kowsari E, et al. Key factors affecting graphene oxide transport in saturated porous media. *Sci Total Environ.* 2020 Jan;698:134224.
  133. Ramazanpour Esfahani A, Batelaan O, Hutson JL, Fallowfield HJ. Transport and retention of graphene oxide nanoparticles in sandy and carbonaceous aquifer sediments: Effect of physicochemical factors and natural biofilm. *J Environ Manage.* 2021 Jan;278(P1):111419.
  134. Zhou Q, Li D, Wang T, Hu X. Leaching of graphene oxide nanosheets in simulated soil and their influences on

microbial communities. J Hazard Mater. 2021 Feb;404(PA):124046.

135. Li X, Gao B, Xu H, Sun Y, Shi X, Wu J. Effect of root exudates on the stability and transport of graphene oxide in saturated porous media. J Hazard Mater. 2021 Jul;413(November 2020):125362.
